# Supplementary material
Source: PubMed Central journal article supplement (PMC4704598)
Supplement: supp_pp.15.01563_01563revSupplemental_Data_1_PDF.pdf [file supp_pp.15.01563_01563revSupplemental_Data_1_PDF.pdf]

**Supplemental Figure S1.** Sequence Comparisons Between AtGPAT9 and Other Plant and Mammalian Proteins.

The amino acid sequence of AtGPAT9 was aligned and compared individually to that of mouse GPAT3 (A), AtLPEAT1 (B), and AtLPEAT2 (C), and AtGPAT7 (D) using the ClustalX algorithm (Thompson et al., 1997). Identical amino acid residues are marked with asterisks, highly similar residues with two dots, and similar residues with one dot.

**(A) mouse GPAT3**

CLUSTAL X (1.81) multiple sequence alignment

```

AtGPAT9      -----MSSTAGRLVTSKSELDDLHPNIEDYLPSG
mGPAT3      MEGADLAVKLLSTWLTLVGGLILLPSAFGLSLGISEIYMKILVKTLEWATLRIQKGAPKE
                .. :   :   . *:   .*: . *

AtGPAT9      SSINE-----PRGKLSLR----DLLDISPTLTEAAGAIVDDSFTRCFKSNP
mGPAT3      SALKNSASVGI IQRDESPMEKGLSGLRGRDFELSDVFYFSKKGLEAIVEDEV TQRFSS EE
                *::::   :*  .**   :*  * :   .:.   ***:*..* : *.*

AtGPAT9      PEPWNWN-----IYLFP----LYCFGVVVRYCILFPLRCFTLAFGWIIFLSLFIPVNA
mGPAT3      LVSWNLLTRTNVNFQYISPRLTMVWVLGVLVRYCFLPLR-VTLAFIGISLLIIGTTLVG
                .**      * : *      : : : ** : ** : * : ** * . ** * * : * : . : .

AtGPAT9      LLKGQDRLRKKIERVLVEMICSFVSWTGVVYHGPRPSIRPKQVYVANHTSMIDFIVL
mGPAT3      QLP-DSSLKNWLSLVHLTCCRICVRSLSGTIHYHNKQYRPQKGGICVANHTSPIDVLIL
                *  . . * : : : : : * : * * : * : : * . : : : * * * * * * * * : *

AtGPAT9      EQMTAFAVIMQKHGPGWVGLLQSTILESVGCIWFNRSEAKDREIVAKKLRDHVQGADSNPL
mGPAT3      ATDGCYAMVGQVHGGLMGI IQRAMVKACPHVWFERSEIKDRHLVTKRLKEHIADKKKLP I
                . : * : * * * : * : * : : : : : * * * * * * * * * * * * * * * * *

AtGPAT9      LIFPEGTCVNNNYTVMFKKGA FELDCTVCP IAIKYNKIFVDAFWNSRKQSFTMHL LQLMT
mGPAT3      LIFPEGTCINNTSVMFMFKKGSFEIGGTIYPVAIKYNPQFGDAFWNSSKYNLVSYLLRIMT
                * * * * * * * * * * * * * * * * * * * * * * * * * * * * * * * * * *

AtGPAT9      SWAVVCEVWYLEPQTIRPGETGIEFAERVRDMISLRAGLKKVPWDGYLKYSRPSPKHSER
mGPAT3      SWAIVCDVWYMPMTREEGEDAVQFANRVKSAIAVQGGTEL PWDGGLKRAKVKDTFKEE
                * * * * * * * * * * * * * * * * * * * * * * * * * * * * * * * * *

AtGPAT9      KQQSFAESILARLEEK----
mGPAT3      QQKNYSKMIVGNGSPNLARD
                * : : : : * : . . . :
    
```

136 residues identical (based on 376 aa in AtGPAT9: 36% identical)  
 90 residues highly similar (60% identical + highly similar)  
 44 residues similar (72% identical + similar)

**(B) AtLPEAT1**

CLUSTAL X (1.81) multiple sequence alignment

```
AtGPAT9      MSSTAGRLVTSKS--ELDL DHPNIEDYLP SGSSINEPRGKLSLRD LLDISPTL TEAAGAI
AtLPEAT1     MESELKDLNSNSNPPSSKEDRPLLKSESDLAAAIEELD KKFAPYARTDLYGTMGLGPFPM
              *.*      * :... . . *:* :.. .:::* *:: * : * : .. :
AtGPAT9      VDDS-FTRCFKSNPPEPWNWNIYLFPLYCFGVVRYCILFPLR--CFTLAFGWII FLSLF
AtLPEAT1     TENIKLAVALVTLVPLRFLLSMSILLYYLICRVFTLFSAPYRGPEEEEEDEGGVVFQEDY
              ::: : : : * : : : : * * : * : * * * * : * : * : :
AtGPAT9      IPVNALLK-GQDRLRKKIERV LVEMICSF FVAS-----WTGVVKYHGPRP
AtLPEAT1     AHMEGWKRTVIVRSGRFLSRVLLFVFGFYWIHESCPDRDSDMDSNPKTTSTEINQKGEAA
              :.. : * : : : * * : : : : : : : : : : : : : * :
AtGPAT9      SIRPKQ--VYVANHTSMIDFIVLEQMTAFAVIMQKHPGWVGLLQSTILESVGCIWFNRSE
AtLPEAT1     TEEPERPGAIVSNHVSYLDILYHMSASFPSFVAKRSVGKLPVVG-LISKCLGCVYVQREA
              : . * : : . * : * * . * : : : . : : : : : * : * : * : : * : : * :
AtGPAT9      -AKDREIVAKKLRDHVQ GADSN----PLLIFPEGTCVNNNYTVMFKKGAFELDCTVCPPIA
AtLPEAT1     KSPDFKGVSGTVNERVREAHSNKSAPTIMLFPEGTTTNGDYLLTFKTGAFLAGTPVLPVI
              : * : * : : : : * : * * . : : : * * * * * . * : * : * :
AtGPAT9      IKYNKIFVDAFWNSRK--QSFTMHLLQLMTSWAVVCEVWYLEPQTIRPGETGIEFAERVR
AtLPEAT1     LKYPYERFSVAWDTISGARHILFLLCQV VNHLEVI RLPVYYPSQEEKDDPK--LYASNVR
              : * * . . . * : : . : : : * * : . * : * * . * : . . : * : * *
AtGPAT9      DMISLRAGLKVPWDGYLKYSRPSPKHSERKQQSFAESILARLEEK
AtLPEAT1     KLMATEGNLILSELG----LSDKRIYHATLNGNLSQTRDFHQKEE-
              . : : : . . * . * * : : : : : : : : * *

```

71 residues identical (19% identical)  
93 residues highly similar (44% identical + highly similar)  
51 residues similar (57% identical + similar)

### (C) AtLPEAT2

CLUSTAL X (1.81) multiple sequence alignment

```
AtGPAT9      -----MSSTAGRLVTSKSELDDLHPNIEDYLPSSGSSINEPRGKLSLRDLLDI
AtLPEAT2     MADPDLSSPLIHHQSSDQPEVVISIADDDDDDESGLN-LLPAVVDPRVSRG--FEFDHLNP
              **  .:* * :: * *...:: **: . . .**  * *:

AtGPAT9      SPTLTEAAGAIVDDSFTRCFKSNPPEPWNWNIYLFPLYCFGVVRYCILFPLRCFTLAFG
AtLPEAT2     YGFLSESEPPVLGPTTVDPFRNNTPGVSGLYEAIKLVICLPALIRLVLFAA---SLAVG
              *:*: .:.. : . *:.*. * . : : * : : : :** . :**.*

AtGPAT9      WIIFLSLFI PVNALLKGDRLRKKIERVLVEMICSFFVASWTGVVKYHGPRPSIRPKQVY
AtLPEAT2     YLATKLALAGWKDKENPMPLWRCRIMWITRICTRCILFSFGYQWIRRKGKPARREIPIV
              :: : : : * : * : . : : : : : : * . . :

AtGPAT9      VANHTSMIDFIVLEQMTAFVIMQKHPGWVGLLQSTILESVGCIWFNRSEAKDREIVAKK
AtLPEAT2     VSNHVSYIEPIFYFYELSPTIVASESHDSLFPVG-TIIRAMQVIYVNRFSQTSRKNVHE
              *:*:* * : * . : : : : : : : : : * : : : * : * * . . . * : : : :

AtGPAT9      LRDHVQGADSNPLLI FPEGTCVNNNYTVMFKKGAFELDCTVCPIAIKYNKIFVDAFWN--
AtLPEAT2     IKRKASCDRFPRLLLFPEGTTTNGKVLISFQLGAFIPGYPIQPVVRYPHVHFDQSWGNI
              :: :.. **:*:*:* * . : : * : * * . . : * : : : * : : : * * .

AtGPAT9      -----SRKQSFTMHLQLMTSWAVVCEVWYLEP-----
AtLPEAT2     SLLTLMFRMFTQFHNFMVEVEYLPVIYPSEKQKQNAVRLSQKTSIAIATSLNVVQTSHSFA
              * . * * . . * . * * * . . : : :

AtGPAT9      -----QTIRPGETG-----
AtLPEAT2     DLMLLNKATELKLENPSNYMVEMARVESLFHVSSLEATRFLDTFVSMIPDSSGRVRLHDF
              : : * . : *

AtGPAT9      -----IEFAERVRDMISLRAG-----LKKVPWDG
AtLPEAT2     LRGLKCLKPCPLSKRIFEFIDVEKVGSI TFKQFLFASGHVLTQPLFKQTCELAFSHCADG
              : : * : : * . . . : : : * *

AtGPAT9      -----YLKYSRSPKHSERK-----QQSFAESILARLEEK-----
AtLPEAT2     DGYITIQELGEALKNTIPNLNKDEIRGMYHLLDDDDQDQRISQNDLLSCLRRNPLLIAIFA
              ** : * . : : * : : * : : * : : : * : : :

AtGPAT9      -----
AtLPEAT2     PDLAPT
```

74 residues identical (20% identical)  
89 residues highly similar (43% identical + highly similar)  
58 residues similar (59% identical + similar)

**(D) AtGPAT7**

CLUSTAL X (1.81) multiple sequence alignment

```
AtGPAT9      MSSTAGRLVTSKSELD---LDHPNIEDYLP----SGSSINEPRGKLSLRDLLDISPTLTE
AtGPAT7      MESSTTTSYSVSVSELEGTLLKNPKPFAYFMLVAFEASGLIRFATLLFLWPPIALLDVLGY
               *.*::      :   ***:   *.:*:   *:       ..*.: .   * *   :: :   .*

AtGPAT9      AAG-----AIVDDSFTRCFKSNPPEPWNWNIYLFPLYCFG-----VVVRYCIL
AtGPAT7      RNGSLKLMIFVATAGLHESEIESVARAVLPKFFMDDISMDAWRAFGSCDKRVVVTRMPRV
               *           .: :.:      :: *.: :   :* : .   .**       ***.*   :

AtGPAT9      FPLRCFTLAFGWIIFLSLFIPVNALLKQDRLRKK-IERVLVEMICSFFVASWTGV----
AtGPAT7      MVERFAKDHLSEADEVIGTEIVVNRFGYATGLIQETNVDQSVFNSVANLFVDRRPQLGLGR
               : * .   :.   .:   * ** :   . .   :.:.   :: :.: :.:**   . :

AtGPAT9      -----VKYHGPRPS-----IRPKQVYVAN-----HTSMIDFIVLEQ
AtGPAT7      HIISDSPTFLSLCEEQVHAPVPSNYNGHNQRLHVQPLPVI FHDGRLVKLPTPATALIILL
               : *.* **           ::* * . :           .:           :::

AtGPAT9      MTAFAVIMQKHGPGWVG-LLQSTILESVGCIWFNRSEAK-----DRE
AtGPAT7      WIPFGIILAMIRIFVGFLPLWAIPIYVSRIFNTRFIVKKGPPAQATTGNPGVLFVCTHRT
               .*.:*:      :** **      : * . *: . *   . *           . *

AtGPAT9      IVAKKLRDHVQG-----ADSNPLLIF
AtGPAT7      LMDPVVLSYVLGRSIPAVTYSISRLSEILSPIPTFRLTRIRDVAEMIKKELSNGLDVVY
               ::      : :.* *           ... *:::

AtGPAT9      PEGTCVNNNYTVMFKKGAFELDCTVCPIAIKYNKIFVDAFWNS--RKQSFTMHLLQLMST
AtGPAT7      PEGTTCREPFLLRFSALFAELTDNIVPVAMNYRVGFFHATTARGWKGLDPIFFFMNPRPV
               ***** .: : : * .   ** .: *:::*.   *..*           : .   :.:: .

AtGPAT9      WAVVCEVWYLEPQTIRPGETGIEFAERVRDMISLRAGLKKVPWDGYLKYSRPSPKHSEK
AtGPAT7      YEVTFLNQLVEEATCSSGKSPYDVANYVQRILAATLGFECTNFTRKDKYRVLGNDGTVS
               : *.           *   .*: :   .*: * : :.:   *:: . :   **   : :.. .

AtGPAT9      QQSFAESILARLEEK-----
AtGPAT7      YLSFLDQVKKVVTTFKPFLH
               ** ::      :
```

68 residues identical (18% identical)  
85 residues highly similar (41% identical + highly similar)  
54 residues similar (55% identical + similar)

**Supplemental Figure S2.** Sequence Comparison of Selected GPAT9 Enzymes from Plants.

Amino acid sequences from *Aquilegia coerulea*, *Arabidopsis thaliana*, *Brachypodium distachyon*, *Cucumis sativus*, *Gossypium raimondii*, *Physcomitrella patens*, *Salix purpurea*, *Selaginella moellendorffii*, and *Solanum tuberosum* were aligned using the ClustalX algorithm as described in Figure S1 above. Amino acids identical in all ten proteins are shaded in black, similar residues are shaded in grey. Name abbreviations indicate the first letter of the genus, and the first two letters of the species.

```
GraGPAT9A 1 -----MNSSEG-KLKSSSELDLDRPNIEDYLPSGSSIQEP----HGKLRRLRDL
GraGPAT9B 1 -----MSSGKGELIPSSSELDLDRPNIEDYLPSGSSIHEP----LGKLRLCDL
SpuGPAT9 1 -----MDTPG-NLKTSISELDLDRPNIEDYLPSGTSIQEP----LDKLSLRDL
StuGPAT9 1 -----MS-NLKSSSELDLDRPNIEDYLPTG-SIQEP----HGKLRRLRDL
AthGPAT9 1 -----MSSTAG-RLVTSKSELDLDPNIEDYLPSGSSINEP----RGKLSLRDL
CsaGPAT9 1 -----MSGAA-LLKSSASELDLDRPNIEDYLPSGSSIQQP----TAKLRRLRDL
AcoGPAT9 1 -----MDIDRPNIEEYLTTD-SIHKP----QEKLLLRDL
BdiGPAT9 1 -----MASS-----LDAPNLDDYLPTDSLPEP----PRSLNLRDL
SmoGPAT9 1 MGIQRTGVKDSNQLRDSSEFRPSQSEVDLYQHDMEDFLDLSAAEPAAPH--QNKLRLCDL
PpaGPAT9 1 -----MEGDQFKGSADGINAGEAGRGICNEVADF LNTNVEEDSSEAYLDNKMQLRDL
```

```
GraGPAT9A 45 LDISPALTEAAGAI VDDSFTRCFKSNPPEPWNWNVYLFPLWCCGVVFRYLILFPMRALVL
GraGPAT9B 46 LDISPTLTEAAGAI VDDSFTRCFKSNPPEPWNWNVYLFPLWCCGVVIRYLILFPVRVIVL
SpuGPAT9 44 LDISPTLTEAAGAI VDDSFTRCFKSNPPEPWNWNVYLFPLWCCGVVIRYGILFPVRVLVL
StuGPAT9 40 LDISPTLTEAAGAI VDDSFTRCFKSNPPEPWNWNIYLFPLWCLGVVRYGILFPPIRVIVL
AthGPAT9 45 LDISPTLTEAAGAI VDDSFTRCFKSNPPEPWNWNIYLFPLYCFGVVRYCILFPLRCFTL
CsaGPAT9 44 LDISPTLTEAAGAI VDDSFTRCFKSNPPEPWNWNIYLFPLWCCGVVIRYLFLFPARVLIL
AcoGPAT9 30 LDISPALTEAAGAI VDDSFTRCFKSNPPEPWNWNVYLFPLWCFGVVIRYGILYFVRVLVL
BdiGPAT9 33 LDISPVLTEAAGAI VDDSFTRCFKSNPPEPWNWNIYLFPLWCFGVVRYGLLFPLRVLTL
SmoGPAT9 59 LDISGVLSEASAI VDDSFTRCFKSNPIPEPWNWNIYLLPLWCLGVIVRYCILFPVRVLLL
PpaGPAT9 54 LDISQVLSEAGSAI VDDSFTRCFKSNAPEPWNWNIYLFPLWVMGVAVRYLILFPPIRVILL
```

```
GraGPAT9A 105 TIGWIIIFLSCFIPVHFLLLKGNLNRKKMERALVELICSFVSWTGVVKYHGPRPSMRPK
GraGPAT9B 106 TVGWIIFLSCFIPVHLLLLKGHDKLQKNMERALVELICSFVSWTGVVINYHGPRPSMRPK
SpuGPAT9 104 AIGWIIIFLSSYIPVHLLLLKGHDKLRKKTIERSLVEVICMFFVASWTGVVKYHGPRPSRRPK
StuGPAT9 100 TIGWIIIFLSCYIPVHLLLLKGHDKFRKLERLVELICSFVSWTGVVKYHGPRPSIRPK
AthGPAT9 105 AFGWIIIFLSLFI PVNALLKQDRLRKKIERVLVEMICSFVSWTGVVKYHGPRPSIRPK
CsaGPAT9 104 TIGWIIIFLSTFI PVNLLLLKGHPKLRAKERLVELICSFVSWTGVVKYHGPRPSIRPK
AcoGPAT9 90 TIGWIIIFLSSFTAVHFLLLKGNDKWRRQMERYLVELICSFVSWTGVVKYHGPRPSMRPK
BdiGPAT9 93 GLGWMVFFAAFFPVHFLLLKQNKLRKSKIERKLVEMMCSVFVSWTGVVVKYHGPRPSRPY
SmoGPAT9 119 TVGWIIFLGAFIPVHFILRKHDHMRRKIERGLVEFICSVFVSWTGVVKYHGPRPSRRPR
PpaGPAT9 114 ALGWIIIFLSLFFPLHFALKNHDQLRRQIERGLVEFMCSVFVSWTGVVKYHGPRPSRRTK
```

```
GraGPAT9A 165 QVVFVANHTSMIDFII LEQMTAFVAVIMQKHPGWVGLLQSTILES VGC IWFNRSEAKDREIV
GraGPAT9B 166 QVVFVANHTSMIDFII LEQMSSFAVIMQKHPGWVGLLQSTILES VGC IWFNRTEAKDRETV
SpuGPAT9 164 QVVFVANHTSMIDFIV LEQMTPFVAVIMQKHPGWVGLLQSTILES VGC IWFHRSEAKDREIV
StuGPAT9 160 QVVFVANHTSMIDFIV LEQMTAFVAVIMQKHPGWVGLLQSTILEG VGC IWFNRSEAKDREIV
AthGPAT9 165 QVYVANHTSMIDFIV LEQMTAFVAVIMQKHPGWVGLLQSTILES VGC IWFNRSEAKDREIV
CsaGPAT9 164 QVVFVANHTSMIDFIV LEQMTAFVAVIMQKHPGWVGLLQSTILES IGC IWFNRTELK DREIV
AcoGPAT9 150 QVVFVANHTSMIDFIV LEQMTAFVAVIMQKHPGWVGLLQSTILES VGC IWFNRTEAKDREIV
BdiGPAT9 153 QVVFVANHTSMIDFII LEQMTAFVAVIMQKHPGWVGF IQKTILES VGC IWFNRNDLKDREVV
SmoGPAT9 179 QVVFVANHTSMIDFII LEQMTAFVAVIMQKHPGWVGLLQNTVLES LGC IWFNRTE SKDRHVV
PpaGPAT9 174 QVVFVANHTSMIDFVILEQMTGFSAIMQKHPGWVGF LQTTVLES LGC IWFNRTEANDRHAV
```

GraGPAT9A 225 TRKLRHSQGADNNPLLIIFPEGTCVNNQYSVMFKKGAFELGCTVCPIAIKYNKIFVDAFW  
 GraGPAT9B 226 TKKLRHSQGVDDNNPLLIIFPEGTCVNNQYSVMFKKGAFELGCTICPIAIKYNKIFVDAFW  
 SpuGPAT9 224 AKKLRDHVQGADNNPLLIIFPEGTCVNNHYTVMFKKGAFELDSTVCPIAIKYNKIFVDAFW  
 StuGPAT9 220 AKKLRQHVEGADNNPLLIIFPEGTCVNNHYTVMFKKGAFELGCTVCPIAIKYNKIFVDAFW  
 AthGPAT9 225 AKKLRDHVQGADSNPLLIIFPEGTCVNNNYTVMFKKGAFELDCTVCPIAIKYNKIFVDAFW  
 CsaGPAT9 224 AKKLRNDHVQGADNNPLLIIFPEGTCVNNHYTVMFKKGAFELGCSVCPIAIKYNKIFVDAFW  
 AcoGPAT9 210 ARKLRDHVQGADNNPLLIIFPEGTCVNNHYTVMFKKGAFELGCTVCPIAIKYNKIFVDAFW  
 BdiGPAT9 213 GRKLRDHVQRPDNNPLLIIFPEGTCVNNQYTVMFKKGAFELGCAVCPIAIKYNKIFVDAFW  
 SmoGPAT9 239 GEKLRKHVIDPESNLLLIIFPEGTCVNNNEYIVMFKKGAFELDCTVCPVAIKYNKIFVDAFW  
 PpaGPAT9 234 AQKLRKHNVDNDANPLLIIFPEGTCVNNNEYIVMFKKGAFELDCVVCPIAIKYNKIFVDAFW

GraGPAT9A 285 NSRKQSFTMHLLQLMTSWAVVCDVWYLEPQNLRPGETPIEFAERIRDIISVRAGLKKVPW  
 GraGPAT9B 286 NSRKQSFTMHLLQLMTSWAVVCDVWYLEPQNLRPDETPIEFAERVRDIISVRAGLKKVPW  
 SpuGPAT9 284 NSRKQSFTTHLLQLMTSWAVVCDVWYLEPQNLRPGETPIEFAERVRGIISDRAGLKKVPW  
 StuGPAT9 280 NSKKQSFTTHLLQLMTSWAVVCDVWYLEPQNLRPGETPIEFAERVRGIISVRAGLKKVPW  
 AthGPAT9 285 NSRKQSFTMHLLQLMTSWAVVCEVWYLEPQTIIRPGETGIEFAERVRDMISLRAGLKKVPW  
 CsaGPAT9 284 NSRKQSFTMHLLQLMTSWAVVCDVWYLEPQVLKPGETPIEFAERVRDIICARAGLKKVPW  
 AcoGPAT9 270 NSRQQSFTMHLLRLMTSWAVVCDVWYLEPQNLMRGETSIEFAERVRDIISVRAGLKKVPW  
 BdiGPAT9 273 NSKKQSFTMHLGRLMTSWAVVCDVWFLEPQYLREGETSIAFTERVDRDIAARAGLKKVLW  
 SmoGPAT9 299 NSRKQSFTMHLLRLMTSWAVVCDVWYLEPQTIIRPNETPIEFAERVRDIAKRAKIKKVAW  
 PpaGPAT9 294 NSKKQSFTMHLVRLMTSWAVVCDVWYLEPQTIKKGETPIEFSEVRDLICTRAGIKKVPW

GraGPAT9A 345 DGYLKYSRPSPKHREKQQSFAESVLRGLELEEK-----  
 GraGPAT9B 346 DGYLKYSRPSPKHREKQQSFAESVLR--RLEEN-----  
 SpuGPAT9 344 DGYLKYSRPSPKHREKQQSFAESVLR--SLEEK-----  
 StuGPAT9 340 DGYLKYSRPSPKHREKQQSFAESVLR--RLEEK-----  
 AthGPAT9 345 DGYLKYSRPSPKHSERKQQSFAESILA--RLEEK-----  
 CsaGPAT9 344 DGYLKHSRPSPKYRERKQQSFAESVLQ--LLDNK-----  
 AcoGPAT9 330 DGYLKYSRPSPKLTEHKQQIFAESVLQ--RLEEK-----  
 BdiGPAT9 333 DGYLKHNRPSPKHTEEKQRIFAESVLK--RLEES-----  
 SmoGPAT9 359 DGYLKYRPSKLTQKQKFAESMLR--RLRKTSDDELSTPMEG  
 PpaGPAT9 354 DGYLKYHRPSPKLTQKQNFSEAVIR--RLNATAQNG-----

**Supplementary Figure S3. Sequence Alignment and Identity/Similarity Shading of Various Plant LPEAT1 Proteins.**

Phylogenetic tree depiction of this alignment makes up part of Figure 1 in the main body of the text.

```
TcLPEAT1      1 -MESELKDLNSKPAKTTQKPDPTH---DDGSTKDDRPLLKSD-----SSSADT-NIQ
VvLPEAT1      1 -MESELKDLN-----PRSNS---QDVSSKDDRPLLKSD-----STVVSQDNLQ
GmLPEAT1      1 -MESELKDLNSKPPN-----GNGN-----SVRDDRPLLKPE-----PPVSADSIA
PpLPEAT1      1 -MESELKDLNSKPAKPVADDGSGEPAHDDASGKDDRPLLKPD-----APQVSTEELQ
CcLPEAT1      1 -MESELKDLNSKQLKSTASSDDGG-----SAKDDRPLLKPD-----AAENIQ
PtLPEAT1      1 -MDTELKSMNPDPPKPE-QDPASR-DDGSNSKDDRPLLKSDSN-----RISSTTGESIE
RcLPEAT1      1 -MDTELKDINPEPSKSKPEPEPAP--DDGS-SKDDRPLLKSDSN-----RMST---ENIE
StLPEAT1      1 -MESELQKLPQPETTRPSQPESID----EGSTKDDRPLLKPDPTNPQLQVQSQSSSPSIE
AtLPEAT1      1 -MESELKDLNSNSNPP-----SSKEDRPLLKSE-----SDLAAAIE
OsLPEAT1      1 MALPLHDATTSPSPDDDLGGGGEEEE----ERLASKPLLSSPST-YPSAGTEEGVEE--L
SiLPEAT1      1 -MAPNDAATTAPSEPEVGG-RMSSE----DTVATRPLLSSPST-SPSAASTAPVQESIE
ZmLPEAT1      1 -MALDTADADAP-----RLRLD----ASAAVHPLLSDDG-STAAGETA-----
```

```
TcLPEAT1      48 ELEKKFAAYVRNDVYGTMGRGKLPKELLLGLIALVTLVPIRVIVLGMTILVFYYLICRVC
VvLPEAT1      40 ELEKKFAAYVRSDAYGPMGCCELPLKEKLLAFALVTLVPIRLVVAFTILVVYYLICRVC
GmLPEAT1      40 DMEKKFAAYVRRDVYGTMGRGELPTKEKLLGFALVTLVPIRVVLAFTILVFYYLICRVC
PpLPEAT1      53 ELEKKCAAYVRRDAYGTMGRGELTVKEKVLGLALVTLVPIRVVLAFTILVIYYLICRVC
CcLPEAT1      42 ELEKKFAPYVRNDVYGTMGRGELPLAEKFLIGIAMVTLVPIRVVLAFTILVIYYLICRVC
PtLPEAT1      53 ELEKKFAAYVRNDVYGPMGRGELPLVEKVLGLIAVTLVPIRVVLAFTILVVYYLICRVC
RcLPEAT1      49 ELEKKFAAYVRNDVYGPMGRAELPLAEKLLGLIALVTLVPIRTLLAITVLLVYYAICRVC
StLPEAT1      56 ELEKKYAPYVRHDVYGTMGRGELPWTEKVLGLIALVTLVPMRVIGATTVLVVYYLICRVC
AtLPEAT1      36 ELDKKFAPYARTDLYGTMGLGPFPMTENIKLAVALVTLVPLRFLLSMSTILLYYYLICRVC
OsLPEAT1      54 ELDRRYAPYARRDAYGAMGRGPLGAAGAGRLAVGAAVLPLRRLAAGVLLVAVYYLVCRVC
SiLPEAT1      54 ELDRRYAPYARRDAYGPMGLGPLVGAEEAFRLAFAAVVLIPLRVVAGMLLVVVYYLVCRVC
ZmLPEAT1      39 QLDARYAPYARRDAYGTMGRGPLPAAQAVRLALAAAVLPLRFRVAGMLVLLLYYLVCRC
```

```
TcLPEAT1      108 TLFLAPNRE--DE-----QEDYAHMGGWRRRAVIVRSGRFLSRVMLFLVGFYWINETH
VvLPEAT1      100 TLFSAPNREGED-----QEDYAHMGGWRRRAVIVQCGRFLSRALFTLGFYWINVTY
GmLPEAT1      100 TLFSAPT--GEEE-----QEDYAHMGGWRRRTIIVSCGRALSRLMLFIFGFYWIPESN
PpLPEAT1      113 TLFSVPN--RDEE-----QEDYAHMGGWRRRAVIVQCGRSLSRMLFVLVGFYWINETY
CcLPEAT1      102 TLFSAPNR-GEDE-----QEDYAHMGGWRRSVIVVSGRFLSRVMSVLVGFYWITETF
PtLPEAT1      113 TLFSAPNRDEEEEE-----QEDFAHMGWRRRAVIVWCGRFLSRMLFVLVGFYWISVSY
RcLPEAT1      109 TLFSAPNRDEEEEE-----QEDFAHMGWRRRAVIVWCGRFLSRVMLFVFGFYWIKETY
StLPEAT1      116 TAFWAPNR--EDE-----QEDYAHTGGWRRRTVMMQSGMFLSRVMLFVFGFYWIHETY
AtLPEAT1      96 TLFSAPYRGPEEEEEDEGGVVQEDYAHMGGWKRTVIVRSGRFLSRVLLFVFGFYWIHESC
OsLPEAT1      114 TLRVEEEREKGGGGAAGEVEGDYARLEGWRRREGVVRCGRALARAMLFFVFGFYWIREYD
SiLPEAT1      114 TLRVEEEREKGGGGAAGEVEGDYARLEGWRRREGVVWCGRALARAMLFFVFGFYWIREYD
ZmLPEAT1      99 TLFVDAD-----GGRPRLAGWRRKAVLRSGCALSRVMLFVFGFYWIRETR
```

```
TcLPEAT1      158 R-----DSANTQENSKTEGINQSEEQERPGAIIVSNHVSYLDILYHMSSSFPSFVAK
VvLPEAT1      152 R-----DPLTTED----EGKDEDEEPPERPGAIISNHVSYLDILYHMSSSFPSFVAK
GmLPEAT1      150 -----SASQED-----KSRQPEE-LRRPGVIIISNHVSYLDILYHMSSSFPSFVAK
PpLPEAT1      163 RIP-----SDAQPNPTTDCCKDEGEEEGTERPGAIISNHVSYLDILYHMSSSFPSFVAK
CcLPEAT1      153 RILDVQEKSENEAKNQSKDEDEAKDQDEESGRPGAIISNHVSYLDILYHMSSSFPSFVAK
PtLPEAT1      165 R-----DIELPDQNKSSSQNEGKDQSEEPERLGAIIISNHVSYLDILYHMSASFPSFVAK
RcLPEAT1      161 R-----ILEPP-----QDEGKDQSEDPERPGAIISNHVSYLDILYHMSSSFPSFVAK
StLPEAT1      166 QP-----INLNGNSNNEEDGSKLQAEELERPGAIIVSNHVSYLDILYHKSASFPSFVAK
AtLPEAT1      156 PDRD-SDMDSNPKTTSTEINQKGEAATEEPPERPGAIIVSNHVSYLDILYHMSASFPSFVAK
OsLPEAT1      174 C-----RFPDAEDEHQEQSKELGRPGAVVSNHVSYVDILYHMSSSFPSFVAK
SiLPEAT1      165 C-----RFPDAEVEHVDQSKEMERPGAIIVSNHVSYVDILYHMSASFPSFVAK
ZmLPEAT1      144 R-----RSTNAKGLNQDQFEESQRPGAIVSNHVSYVDILYHMSASFPSFVAK
```

TcLPEAT1 209 RSVAKIPLVGLISKCLGCVYVQRESKSSDFKGVAGVVTERVCEAHQNESAPMMLLFPEGT  
VvLPEAT1 199 RSVAKLPLIGLISKCLGCVYVQRESKSSDFKGVAGVVTERVCEAHQNKFPMMMLLFPEGT  
GmLPEAT1 194 RSVAKLPLVGLISKCLGCVYVQRESRSDFKGVS AVVTDRIREAHQNESAPLMMLLFPEGT  
PpLPEAT1 216 RSVAKLPLVGLISKCLGCVYVQRESKSSDFKGVSGVVTERVKEAHQNN SAPMMLLFPEGT  
CcLPEAT1 213 RSVAKLPLVGLISKCLGCVYVQRESKSSDFKGVSGVVTERVREAHRDKSAPMMLLFPEGT  
PtLPEAT1 219 RSVAKLPLVGLISKCLGCVYVQRESKSSDFKGVSGIVTERVKESHENSSAPMMLLFPEGT  
RcLPEAT1 208 RSVAKLPLVGLISKCLGCVYVQRESKSSDFKGVAGVVTERVREAHQNK SAPIMMLLFPEGT  
StLPEAT1 218 RSVAKLPLVGLISKCLGCVYVQRESKSPDFKGVSGVVNERIREAHQNK SAPIMMLLFPEGT  
AtLPEAT1 215 RSVGKLPLVGLISKCLGCVYVQREAKSPDFKGVSGTVNERVREAHSNKSAPT IMLLFPEGT  
OsLPEAT1 221 RSVARLPMVGLISKCLGCI FVQRESKTSDFKGVSGAVTERIQRAHQQKN SPMMLLFPEGT  
SiLPEAT1 212 RSVARLPLVGLISKCLGCI FVQRESKTSDFKGVSGAVTERIQRAHQQKN APMMLLFPEGT  
ZmLPEAT1 191 ESVSRLPLIGLISNCLGCI FVQRESKSSEAKGVSGAVTERIQDVCQDKNT PMMLLFPEGT

TcLPEAT1 269 TTNGDFLLPFKTGAFLARAPVVPVILRYPYQRFSPAWDSISGLRHVVFLLCQFVNRMEVT  
VvLPEAT1 259 TTNGGFLLPFKTGAFLAKAPVLPVILRYPYQRFSPAWDSISGVRHVIFLLCQFVNHIEVT  
GmLPEAT1 254 TTNGEFLLPFKTGGFLAKAPVLPVILQYHYQRFSPAWDSISGVRHVIFLLCQFVNYMEVI  
PpLPEAT1 276 TTNGDFLLPFKTGAFLAKAPVLPVILRYPYERFSPAWDSISGVRHVIFLLCQFVNHIEVT  
CcLPEAT1 273 TTNGDYLLPFKTGAFLARAPVLPVILRYPYQRFSPAWDSISGARHVFFLLCQFVNHIEVT  
PtLPEAT1 279 TTNGDFLLPFKTGAFLATAPVRPVILRYPYQRFSPAWDSISGALHVFFLLCQFINHMEAV  
RcLPEAT1 268 TTNGDFLLPFKTGAFLAGAPVLPVILRYPYQRFSPAWDSISGVRHVIFLLCQFVNCIEVT  
StLPEAT1 278 TTNGDFLLPFKSGAFLSGAPVQPVILRYPYQRLSPAWDSISGARHVILLLCQFVNYLEAT  
AtLPEAT1 275 TTNGDYLLTFKTGAFLAGTPVLPVILKYPYERFSPAWDTISGARHIFLLCQVFNHLEVI  
OsLPEAT1 281 TTNGDYLLPFKTGAFLAKAPVKPVILRYPYKRFSPAWDSMSGARHVFFLLCQFVNNLEVI  
SiLPEAT1 272 TTNGDYLLPFKTGAFLAKAPVQPVILRYPYKRFNPAWESMSGARHVFFLLCQFVNYVEVT  
ZmLPEAT1 251 TTNGDYLLPFKTGAFLAGAPVQPVILKYPYRRFSPAWDSMDGARHVFFLLCQFVNHMEVV

TcLPEAT1 329 WLPVYYPSQQEKDDPKLYANNVRRLMANEGNLI LSLDI GLAEKRTYHAALNG-----LFC  
VvLPEAT1 319 RLPVYIIPSSQQEKDDPKLYANNVRKLMASEGNLIMSDI GLAEKRIYHAALNG-----LFC  
GmLPEAT1 314 RLPVYHPSQQEMDDPKLYANNVRRLMATEGNLILSDI GLAEKRIYHAALNGNNSLPSVLH  
PpLPEAT1 336 RLPVYHPSQQEKDDPKLYATNVRRLMASEGKMTQSDI GLAEKRVIYHAALNGNNSRPSVLH  
CcLPEAT1 333 SLPVYHPSQQEKDDPKLYAENVRRLMASERNLTVSDI GLAEKRIYHAALNGNNSLPSVLH  
PtLPEAT1 339 WLPVYYPSQQEKDDPKLYASNVRRLMAREGNLKMSDI GLAEKRIYHTALNGNISLPSVLH  
RcLPEAT1 328 RLPVYYPSQQEKDDPKLYANNVRRLMAHEGNLLMSDI GLAEKRVIYHAALNGLF-----  
StLPEAT1 338 WLPVYYPSQQEKDDPRLYAENVRRLMAHEGNLLLSDI GLAEKRVIYHAALNG-----LFC  
AtLPEAT1 335 RLPVYYPSQQEKDDPKLYASNVRKLMATEGNLILSELGLSDKRIYHATLNGNLSQTRDFH  
OsLPEAT1 341 HLPVYYPSQQEKEDPKLYANNVRKLMAVEGNLILSDI GLAEKRVIYHAALNGNNSLPRALH  
SiLPEAT1 332 HLPVYYPSQQEKDDPKLYANNVRKLMAVEGNLILSDI GLAEKRVIYHAALNGN-SLPRALH  
ZmLPEAT1 311 RLPVYYPSQLEKEDPKLYANNVRKLIAMEGNLVLSNI GLAEKRVIYHAALTGS-SLPGARH

TcLPEAT1 383 QS--  
VvLPEAT1 373 QR--  
GmLPEAT1 374 QKDE  
PpLPEAT1 396 QKDD  
CcLPEAT1 393 QKDD  
PtLPEAT1 399 QKDD  
RcLPEAT1 ----  
StLPEAT1 392 QQ--  
AtLPEAT1 395 QKEE  
OsLPEAT1 401 QKDD  
SiLPEAT1 391 QKDD  
ZmLPEAT1 370 EKDD



**Supplementary Figure S4.** Sequence Alignment and Identity/Similarity Shading of Various Plant LPEAT2 Proteins. Phylogenetic tree depiction of this alignment makes up part of Figure 1 in the main body of the text.

```

PpLPEAT2      1  MADN-----DIASPLISSPPSDHP-----HLILTQDDTDTD-HNNHNGNHG
VvLPEAT2      1  MAGTG----ADLITPLISSQPSDQP-----ELILTVDDRPGFESFSDHCSSNG
PtLPEAT2      1  MAN-----HDLESPLISSQPSDPP-----HIILNVHSDSDS-----SIQQS
RcLPEAT2      1  MTD-----DSLSSPLLQPQPSDHP-----PVILSIRDNHN-----HYYHR
CcLPEAT2      1  MADHHRDHDHDLSSPLLQSPRS DHS-----PVIISIEADGNDTVSDPATQDQL
TcLPEAT2      1  MAE-----HDLTSPLLSRSDSQP-----QTVLIVSDEDEDSEPSDRPPSNQQ
AtLPEAT2      1  MADP-----DLSSPLIHHQSSDQP-----EVVISIADDDDDDESGLNLLPAVV
GmLPEAT2      1  MADD-----SDLTSPLLSSSSSSSSD-----HVVVTVHPSAAP-----
StLPEAT2      1  MSDH-----SIFAPLIPSDHLPHKSNQDQEHAPHPHVILTVEDDGVQH-----QLSNG
SiLPEAT2      1  MASTSPSP-ASLFTPLLSGSVAPAR-----AANGHANNHR--HHGDS DG
ZmLPEAT2      1  MASTCLAP-ASLSTPLLSDSIARAP-----AANGHATNHRHHHHHDDSDG
OsLPEAT2      1  MASRNPS-ASLSTPLLSDSISPTP-----TTNGHAGHHN--HHDDDEE
  
```

```

PpLPEAT2      42  S-----NSTHHHFR--NPYAFILGSDG-----FTVPGSTTADPFRNHTL
VvLPEAT2      45  T-----KSDHTQPESDNPFEFLGSAG-----FVSPGTPTVDPFRNNTTP
PtLPEAT2      36  N-----NHKPNPNTSSRNPFEFILGSDG-----LSVPAPSTLDPFRNDTP
RcLPEAT2      36  H-----NSNSSHN-LRNPFEFLGSDF-----LSVPPPSTVDPFRNNTTP
CcLPEAT2      49  N-----NHDTRYHNNPGNPYWFILGSDG-----LSVPGPNTANPFLNDTP
TcLPEAT2      43  SSLQTGIPRQNHNQSYGNNGNSQVSSRNPFYEFILGSDG-----FVSPAPTIDPFRNGTP
AtLPEAT2      43  DP-----RVS RGFEDHLNPFYGF LSESE-----PPVLGPTTVD PFRNNTTP
GmLPEAT2      34  -----PRNPFVRVLGTDDDDDDLSVPPPSTLDPFRNRTP
StLPEAT2      50  D-----HLGTHISEVDDNPFYAF LGANR-----FDMPGSTTVD PFRNNTTP
SiLPEAT2      42  AA-----AVSVCDDGGG-DPFAFLSEDRPP-----QDRGPSADPFRNGTP
ZmLPEAT2      44  AA-----AVSVCDDGGG-DPFAFLSEDRPP-----RDRGPSADPFRNGTP
OsLPEAT2      42  SP-----TVCGGDGGGGDPFAFLSEDRPAW--WSPRGVSPADPFRNGTP
  
```

```

PpLPEAT2      78  EIRG-LYEWLKIGICLPALARLVLF GASLLIGFVATKLALQG WKDK-----KNPMP
VvLPEAT2      83  KIDG-FYEFWKILVCPVIAAIRLVLFGLCLLVGYLATKFALQG WKDK-----QNPMP
PtLPEAT2      75  DIEG-LYELIKIVICLPVIAIVRLVLFVCLATGYVATKIALLGWRDK-----HNPMP
RcLPEAT2      74  KIEG-VYEV LKSLICLPALARLVLF GACLLVGYLATKLALGGWKDK-----NNPMP
CcLPEAT2      88  HVVG-VYEFVKIVVCFPIV LIRLVLF GFCLLVGYLATKLAL EGWKDK-----QNPMP
TcLPEAT2      98  FVSG-VYEVIKILLCLPIALARLVLFVCLAVGYIATRIAL EGWKDK-----QNPMP
AtLPEAT2      83  GVSG-LYEAIKLVICLPVIALIRLVLFVCLAVGYLATKLALAGWKDK-----ENPMP
GmLPEAT2      68  AIEG-LYEWAKTVLCLPLAALRLAIFGLCLALGYVATKVALQG WKDK-----ENPMP
StLPEAT2      89  RVEG-VYEWLKVIVCLPITLVRVLFGLALMIGYVATRTALLG WKDR-----SSPMP
SiLPEAT2      82  AWGGGVYAWARTLL LAPVAAVRLVLFGLAIAIGYAATWVALRGWADVQDRP-REGAGPMP
ZmLPEAT2      84  AWGGGVYAWSRTL LLLPVALVRLALFGLSIAIGYAATWVALRGWADTHGRP-RVGGGPMP
OsLPEAT2      85  GWCG-AYELVRALVCA PVAAARLVLFGLSIAVGYAATWVALRGWVDVRERAAQEGAGPMP
  
```

```

PpLPEAT2      129  KWRRCRIMWITRVCTRCILFSFGYHWIRRKGKPPAPREIAPIVVSNHVSFIEPIFYFYELFP
VvLPEAT2      134  KWRCRMVWVTRICSR CILFSFGYHWIKRRGRPASRETAPIVVSNHVS YVEPIFFFYELFP
PtLPEAT2      126  KWRSRLMWLTRGCTRCILFSFGYHWIKRKGKLPAPREIAPIVVSNHVS YIDPIFFYFFFFFP
RcLPEAT2      125  KWRS-----SYHWIKRKGKPPAPREIAPIVVSNHVS YIEPIFYFYELFP
CcLPEAT2      139  VWRSRMLMWVTRVCSRCILFSFGYHWIRRKGKPPAPRQIAPIVVSNHVS YIEPIFFFYELFP
TcLPEAT2      149  KWRSRIMWVTRVCARFILFSFGYQWIRRKGKPPAPRDVAPIVVS NHVSYIEPIFYFYELFP
AtLPEAT2      134  LWRCRIMWITRICTRCILFSFGYQWIRRKGKPPARREIAPIVVSNHVS YIEPIFYFYELSP
GmLPEAT2      119  KWRCRMWITRLCARCILFSFGYQWIKRKGKPPAPREIAPIVVSNHVS YIEPIFYFYELFP
StLPEAT2      140  KWRSRLMWVTRMSARTILFSFGYQWIRRKGKPPAPREIAPIVVSNHVS YIDPIFFFYELFP
SiLPEAT2      141  AWRRLMWITRISARCILFSFGYHWIRKGRPARRELAPIVVSNHVS YIEPIFFFYELFP
ZmLPEAT2      143  AWRRLMWITRISARCILFSFGYHWIRKGRPARRELAPIVVSNHVS YIEPIFFFYELFP
OsLPEAT2      144  AWRRLMWITRISARCILFSFGYHWIRKGRPARRELAPIVVSNHVS YIEPIFFFYELFP
  
```

PpLPEAT2 189 TIVASESHDSLPLVGTIIRAMQVIYVNRFSASSRKHAVSEIKRKASCDFRFRVLLFPEGT  
VvLPEAT2 194 TIVASESHDSLPLFVGTIIRAMQVIYVNRFSQSSSRKQAVNEIKKKASCERYPRVLLFPEGT  
PtLPEAT2 186 TIVAAESHDSMPFVGTIIRAMQVIYVNRFSPPSSSRKLAVNEIKRKASCGRFRVLLFPEGT  
RcLPEAT2 168 TIVAAESHDSLIPFVGTIIRAMQVIYVNRFSQSSSRKLAVNEIKRKASCDFRFRVLLFPEGT  
CcLPEAT2 199 TIVASESHDSLIPFVGTIIRAMQVIYVDRFSQSSSRKNAVSEIKRKASCDFRFRVLLFPEGT  
TcLPEAT2 209 TIVASESHDSLIPFVGTIIRAMQVIYVNRFSQASRKNAVNEIKRRASCDFRPRLLLFPEGT  
AtLPEAT2 194 TIVASESHDSLPLFVGTIIRAMQVIYVNRFSQTSRKNAVHEIKRKASCDFRPRLLLFPEGT  
GmLPEAT2 179 TIVAAESHDSLIPFVGTIIRAMQVIYVNRFLPSSSRKQAVREIKRRASCNRFPRVLLFPEGT  
StLPEAT2 200 TIVASESHDSMPFVGTIIRAMQVIYVNRFSPTSRSKHAINEIKRKASCDFRFRVLLFPEGT  
SiLPEAT2 201 TIVASESHDALPFVGTIIRAMQVIYVDRFSPASRKA AVNEIKRKAACNSFPRVLLFPEGT  
ZmLPEAT2 203 TIVSSESHDALPFVGTIIRAMQVIYVDRFSPASRKA AVNEIKRKAACNSFPRVLLFPEGT  
OsLPEAT2 204 TIVSSDSHDSLIPFVGTIIRAMQVIYVDRFSPASRKS AVNEIKRKAACNSFPRVLLFPEGT

PpLPEAT2 249 TTNGRFLISFELGAFIPGFPIQPVTVRYPHVHFDQSWGHI SLAKLMFRMFTQFHNFMVEVE  
VvLPEAT2 254 TTNGRVLISFQLGAFIPGYPIQPVVVRYPHIHFDQSWGHI SLGRLMFRMFTQFHNFMVEVE  
PtLPEAT2 246 TTNGKVLISFQLGAFIPGYAVQPVI VRYPHVHFDQSWGNI SLGMLMFRMFTQFHNFMVEVE  
RcLPEAT2 228 TTNGKVVISFQLGAFIPGYATQPVI VRYPHVHFDQSWGNI SLAKLMFRMFTQFHNFMVEVE  
CcLPEAT2 259 TTNGKFLISFQLGAFIPAYPIQPVI VRYPHVHFDQSWGDI SLGKLMFRMFTQFHNFMVEVE  
TcLPEAT2 269 TTNGKVLISFQLGAFIPGHPIQPVVVRYPHVHFDQSWG LI SLAKLMFRMFTQFHNFMVEVE  
AtLPEAT2 254 TTNGKVLISFQLGAFIPGYPIQPVVVRYPHVHFDQSWG NI SLLTLMFRMFTQFHNFMVEVE  
GmLPEAT2 239 TTNGRNLISFQLGAFIPGYPIQPVI VRYPHVHFDQSWGHI SLGKLMFRMFTQFHNFMFEVE  
StLPEAT2 260 TTNGRSIISFQLGAFIPGYPIQPVI VRYPHVHFDQSWGNI SLAML MFRMFTQFHNFMVEVE  
SiLPEAT2 261 TTNGRFLISFQHGAFIPGYPVQPVVVRYPHVHFDQSWG NI SLLKLMFKMFTQFHNFMVEVE  
ZmLPEAT2 263 TTNGRFLISFQHGAFIPGYPVQPVVVRYPHVHFDQSWG NI SLLKLMFKMFTQFHNFMVEVE  
OsLPEAT2 264 TTNGRFLISFQHGAFIPGYPVQPVI VRYPHVHFDQSWGNI SLGKLMFKMFTQFHNFMVEVE

PpLPEAT2 309 YLPVVSPLDNKKESAVRFSERTCHAMATSLNVVQTSHSYGD LMLLMKATQSKSKLERPAS  
VvLPEAT2 314 YLPVISPLENKKENAVHFAKRTSHAIAT ALNVVQTSHSYGD LMLLTRASQSKQ--EKPSS  
PtLPEAT2 306 YLPIVSPLDNCKENPSHFAKRTSHAIASALNVVQTNHSYGD LMLLMKASELKQ--EKPSS  
RcLPEAT2 288 YLPIVSPLDNCKENPVHFAKRTSHSIA SALNVVQTFHSYGD LMLLMKASHSKQ--EKPSS  
CcLPEAT2 319 YLPVVFPSDNQKENALRFAERTSHAMASALNAVQTS HAYGD LMLLMKASELKE--ENASS  
TcLPEAT2 329 YLPTIMPPDHQKQNAVHFAERTGQAMASALNVVQTS HSYGD LMLLMKAAQLQK--EKPWS  
AtLPEAT2 314 YLPVIYYPSEKQKQNAVRLS QKTSHAIATSLNVVQTS HSFAD LMLLNKATELKL--ENPSN  
GmLPEAT2 299 YLPVIYPLDD-KETAVHFRERTSRDIAT ALNAVQTGHSYGD IMLHMKAQEAQK--ENPSS  
StLPEAT2 320 YLPVITPHENRKESAVRLS QRTGHAVASALNVVQTS HSYGD VLLLAKALEANQ--ENPSL  
SiLPEAT2 321 YLPVVYPPEIKQENALHFAENTNYAMARALNVLPTS SYSYGDSMIMARAVEAGK--ANCSN  
ZmLPEAT2 323 YLPVVYPPEIKQENALHFAEDTSYAMARALNVLPTS SYSYGDSMIMARAIEAGK--VNGSN  
OsLPEAT2 324 YLPVVYPPEIKQENALHFAENTSYAMA HALNVIPTS SYSYGDSMIMARAVEDGK--VNCSN

PpLPEAT2 369 YMVEMATVKSL LHISSMEAVDFLDKFLSMNPDPRGHVNYSGFLRVLRLKACTFSEEIFGF  
VvLPEAT2 372 YMVMARVLESSFHLSLEAVDFLDTFVSMNPDPSGCVKIHDFFRVLRLKPCYLSEKIFGF  
PtLPEAT2 364 YMVEMAKVESLFHINSLEAVNFDLDFKFLSMNPDASGRVKFNDFLRAFRLRRTCTLSEELFGF  
RcLPEAT2 346 YMVEMAKVESLYHISSLEAVDFLDKFLSMNPDPSGRVKFHDFLRAMRLRRTCSLLEEIFGF  
CcLPEAT2 377 YMVMARVGSIFHISSLEAVNFLEKFLSMNPDPSGCVKLLDFLSVLRLKTCPLSDEIFGF  
TcLPEAT2 387 YMVMARIESLYHISSLEAVDFLDKFLSMNPDTS GCVKLHDFLRVLRLKACTLSEEIFGF  
AtLPEAT2 372 YMVMARVESLFHVSLEATRFLDTFVSMIPDSSGRVRLHDFLRGLKLPKPLSKRIFEF  
GmLPEAT2 356 FMVEMTKVESLFHISSMEAVDFLDKFLAMNPDSSGRVQYHDFLRVLRLKACPLSAKIFSF  
StLPEAT2 378 YLVEMAGVEAEFHLSSLEAVDFLDVFLSMNPD SRGQVEIHHFLKVLRLKLPSTLSEKIFGF  
SiLPEAT2 379 YMVEMAWKDMYGVSTAEAMELLEHFLAMNPDSDGRVKAQDFWAYFGLDCSPLCKKIFHY  
ZmLPEAT2 381 YMVEMAWKDIYGVSTAEAMDLEHFLAMNPDNDGRVKAQDFWAHFGLDCSPLCKKIFHY  
OsLPEAT2 382 YMVEMAWKETYGVSTSEAMALLEDFLCMS PDKDGRVNAQDFWAHFGLNCTPLCKKIFQY

PpLPEAT2 429 IDVEKSGSITFKQFLFGSVHVLKQPLFRRACELVFSEYVSGENDYISEQEFGESVRPAIP  
VvLPEAT2 432 IDVDKSGRVTFKQFLFGSAHVMKQPLFRQACELAFACDSGDGLYISEQELGDSIRPVIP  
PtLPEAT2 424 LDVEKNGSITFKQFLYGSAAHVMKRPLFHQSCELAFAQC DTRGHNQISEQELGETIRHAIP  
RcLPEAT2 406 VDVEKIGSITFKQFLYGSAAHVMKQPLFRQTC ELACTRCSGGEDNLSKEQLGDTIRLAIP

CcLPEAT2 437 IDVDKNGSIITFKQFLYASAHVMKLPFLFWQACELAFAECDPDGNGFISENQLEVTIRPAIP  
 TcLPEAT2 447 LDVEKNGSIITFKQFLFGSAHVLRKQPLFRQACELAFAECDVEGENYFMEKDLADILRHAIP  
 AtLPEAT2 432 IDVEKVGSIITFKQFLFASGHVLTQPLFKQTCELAFAESHCDADGDGYITIQELGEALKNTIP  
 GmLPEAT2 416 IDVEKSGTIITFRQFLYGSAAHVMSQPGFHHQACEEAFAGCGGAVKAYVVEQELRDFIQPVIL  
 StLPEAT2 438 IDVQKSGKIITFKQFLVGSAAHILKQPLFHQACESAFTACDGDGKNYIMEKEFGDSIMLSIP  
 SiLPEAT2 439 FDFSIKESIITFRQFLVGCALHRKQPLFQGACETAFAEKCRDPETSEISRQQLADILRLSML  
 ZmLPEAT2 441 FDLGIKESIITFRQFLVGCALHRKQPLFQGACETAFAEKCRDPETSEISRQQLADVLRLSML  
 OsLPEAT2 442 FDFEAKESIITFRQFLIGCALHRKQPSFQDACEATAFERCRNPLTSHIGREQLADVLRSSML

PpLPEAT2 489 DLNED-EVHELFNLFADAGDGRISKDEFWTC LKRNPLLIALFSPCLLNKDISQDGNRLEE  
 VvLPEAT2 492 DLNED-EIQEMFNLFDTDKDGRVSKDDFSNCLRRHPLLIALFSPSLHNA-----  
 PtLPEAT2 484 DFDED-EIHFLFSIFDMGDGGSVSKDNFLYCLRQNPLLIALFKPCLVHKDSSQVGGGILE  
 RcLPEAT2 466 DLDDA-EIHFLFKLFGGNDDGRASKETFMCCLKKNPLLIALFWPCLVYKDSLECGGRMLE  
 CcLPEAT2 497 DLNKY-EIDSLFRLFDSDGDGRVSRDDFICCLRKNPLLIALFSPCLLNKDISQDGNRLEE  
 TcLPEAT2 507 ELNED-EIHGLFNLFADAGDGRISRDDFFSCLRKNPLLIALFSPCLLNKDISQDGNRLEE  
 AtLPEAT2 492 NLNKD-EIRGMYHLLDDDQDQRISQNDLLSCLRRNPLLIALFAPDLAPT-----  
 GmLPEAT2 476 NWESED-EVHELFMVFNDNDGRIDKNDFLSCLRKTPLLIALFSPCLLNKDISQDGNRLEE  
 StLPEAT2 498 GLSNN-EIRGLFTLFDIDRDGKMSKDDFIGCLRRYPLLIALFSPCLLNKDISQDGNRLEE  
 SiLPEAT2 499 LPSDD-GMQKLFKTFDVGDEKISRDDFITCLGRFPPLLIALFAPDLAPT-----  
 ZmLPEAT2 501 LPSGD-RMLDLFKTFDIDGDEKISKDDFMTCLGRFPPLLIALFAPDLAPT-----  
 OsLPEAT2 502 ELMTDNGMMKLFKTLDVDDDGGISKDDLMSLRKLPFMIALFARRINGEVYIEIV-----

PpLPEAT2 548 IV-  
 VvLPEAT2 ---  
 PtLPEAT2 543 EIV  
 RcLPEAT2 525 ELV  
 CcLPEAT2 556 DVI  
 TcLPEAT2 566 EIV  
 AtLPEAT2 ---  
 GmLPEAT2 533 IV-  
 StLPEAT2 ---  
 SiLPEAT2 ---  
 ZmLPEAT2 ---  
 OsLPEAT2 ---

**A** *gpat9-1* Salk\_052947C      *gpat9-2* GABI\_867A06

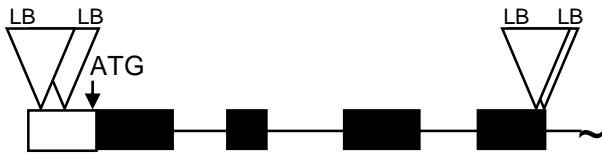

**B**

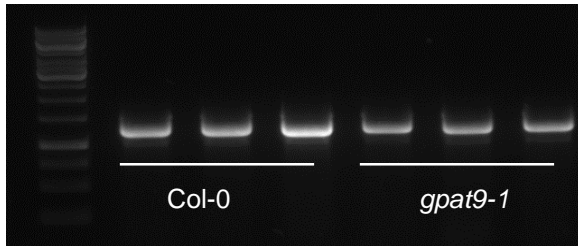

**C**

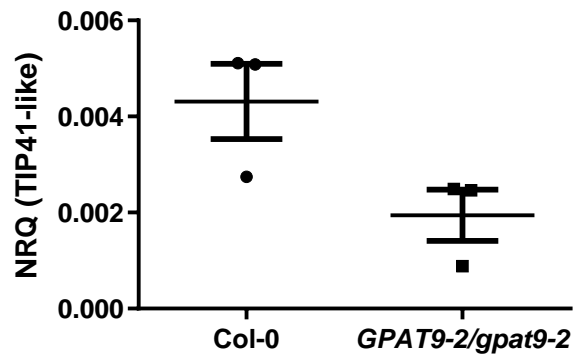

## Supplemental Figure S5. Characterization of *GPAT9* T-DNA Insertions

**(A)** Representation of *GPAT9* T-DNA insertion locations. For both lines T-DNA left border primers will generate amplicons with gene specific primers flanking either side of the insertion suggesting there are multiple insertions with inverse orientation. The *gpat9-1* insertions are 46 bp upstream of the coding sequence. The *gpat9-2* insertion is at the end of the 4<sup>th</sup> exon. Pictured is just the first four exons out of 12 in *AtGPAT9*.

**(B)** RT-PCR of full length *GPAT9* coding sequence from leaves of homozygous *gpat9-1*.

**(C)** qPCR results for *GPAT9* wild-type (Col-0) and *GPAT9/gpat9-2* leaves.

### Methods:

**(A)** For insertion site sequencing the left border-gene junction was amplified by PCR with GoTaq® Flexi (Promega), gel purified by QIAquick Gel Extraction Kit (QIAGEN) and sequenced from both the left border primer and a flanking gene-specific primer by Eurofins (<http://www.eurofinsgenomics.com/>).

**(B-C)** Leaf RNA extraction with RNeasy Plant Mini Kit (QIAGEN) and treated with RNase-free DNase (Qiagen) and on-column DNase digestion. RNA was quantified using a Nanophotometer (Implen Inc). cDNA was synthesized using SuperScript III First-Strand Synthesis System for RT-PCR (Life Technologies). RT-PCR utilized standard conditions as per GoTaq® Flexi (Promega) protocol with 30 cycles of amplification. For qPCR transcript levels were analyzed by quantitative PCR (qPCR) using Platinum SYBR Green qPCR SuperMix-UDG (Life Technologies) and the Stratagene Mx3005P Quantitative PCR system (Agilent Technologies Inc). Transcript was normalized to the *TIP41-like* gene (Czechowski et al., 2005).

**(A-C)**, the sequences for primers utilized are shown in supplemental table S1.

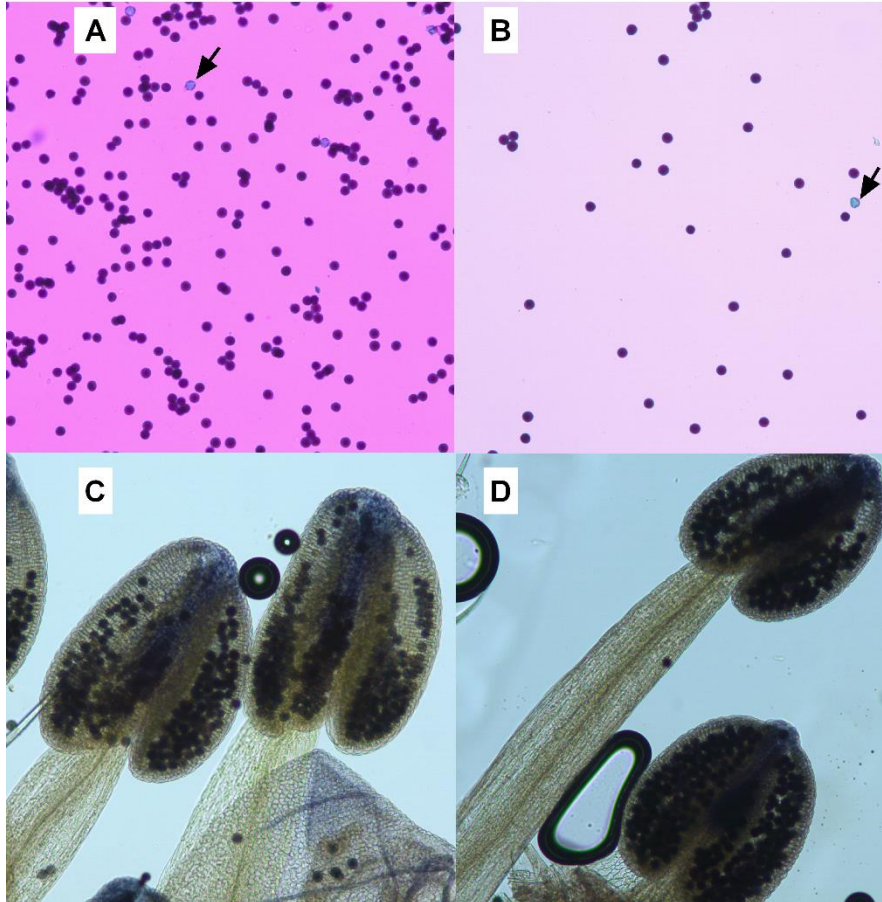

**Supplemental Figure S6.** Analysis Of Viability in Wild-Type and *GPAT9-2/gpat9-2* Pollen.

**(A-B)** Alexander staining (Peterson et al., 2010) for pollen abortion. Purple = non-aborted pollen, green pollen (black arrows) = aborted pollen. Pollen from wild-type (A), and *GPAT9/gpat9-2* (B) plants.

**(C-D)** Nitro blue tetrazolium staining for pollen viability (Regan and Moffatt, 1990). Viable pollen stain black. Anthers from wild-type (C), and *GPAT9/gpat9-2* (D) plants.

**Supplemental Figure S7.** Genetic Complementation of *gpat9-2* Mutants with Transgenic Plant *GPAT9*.

Hemizygous *gpat9-2* plants were transformed with different binary vectors, with or without functional full-length plant ORFs driven by the *AtGPAT9* promoter. T4 generation seeds from DsRed-fluorescent and sulfadiazine-resistant representative lines from: negative control B110 (A, D); *AtGPAT9*prom::*AtGPAT9* (pE434, B, E); or *AtGPAT9*prom::*VfGPAT9* (pE437, C, F) were sown on solid agar media containing sulfadiazine. Wide-angle views of the agar plates are shown in the top panels, close views of the same plates are shown in the bottom panels. Note the high proportion of stunted and aborted seedlings on the negative control plate compared to the high number of healthy, complemented seedlings established on both the E434 and E437 plates.

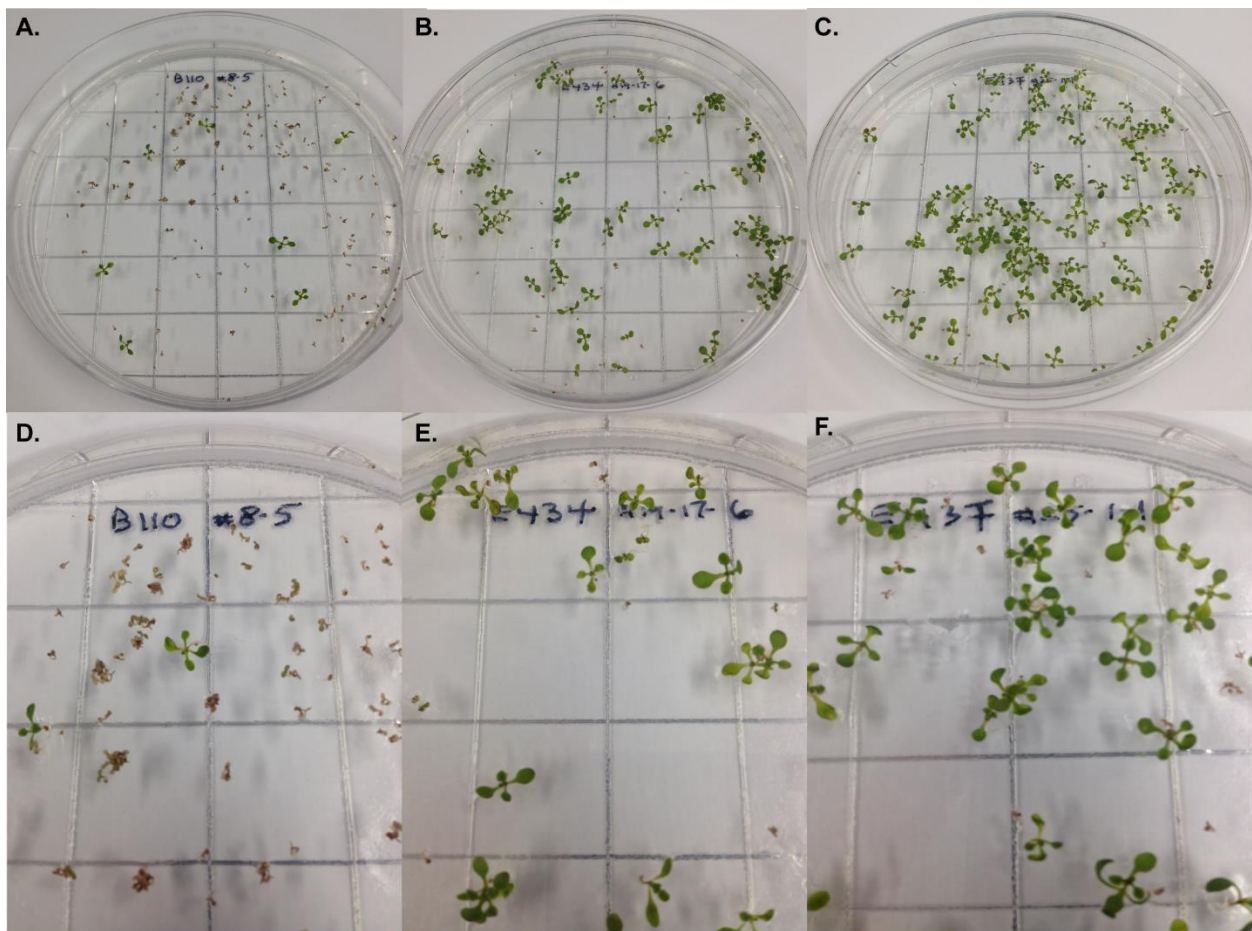

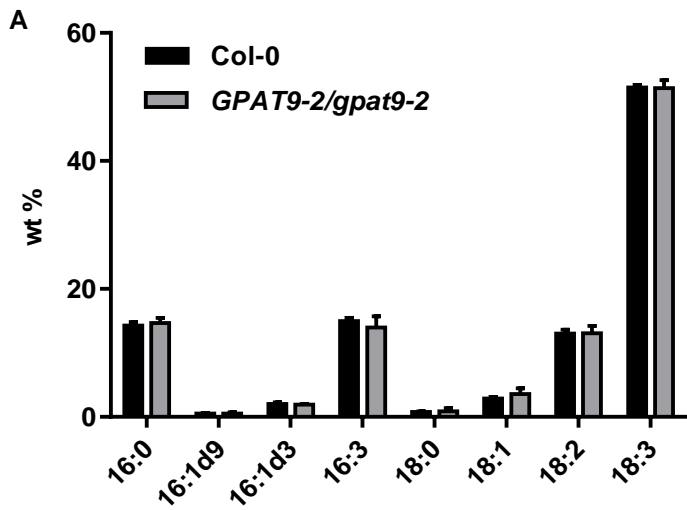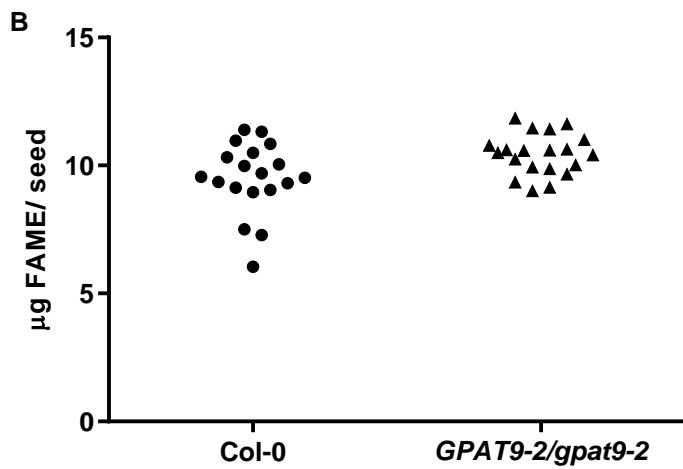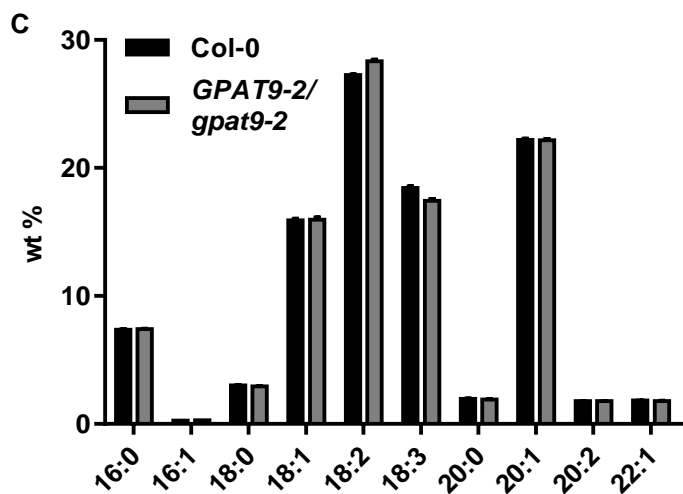

**Supplemental Figure S8.**  
Lipid Characterization of  
Wild-Type and *GPAT9-2/gpat9-2* Plants.

**(A)** The relative fatty acid composition of leaves. Average and standard deviation.  $n = 5$  for wild-type (Col-0), and 13 for *GPAT9-2/gpat9-2*.

**(B)** Total seed fatty acid content from seeds of plants grown at the same time under 24 hr light  $\sim 150$ - $170 \mu\text{mol}/\text{m}^2/\text{sec}$  white light. 30 seeds per FAME analysis from a single plant.  $n = 19$ - $20$  individual plants per line.

**(C)** The average fatty acid composition of seeds from part B. Bars are average and standard deviation.





**Supplemental Figure S10.** Expression of *GPAT9* in Developing Seeds of Wild-Type and *GPAT9* amiRNA Knockdown Lines.

*GPAT9* transcript was normalized to *TIP41-like* (Czechowski et al., 2005). Two biological replicates for Col-0, and three biological replicates for each amiRNA knockdown line. Each biological replicate is the average of three technical replicates.

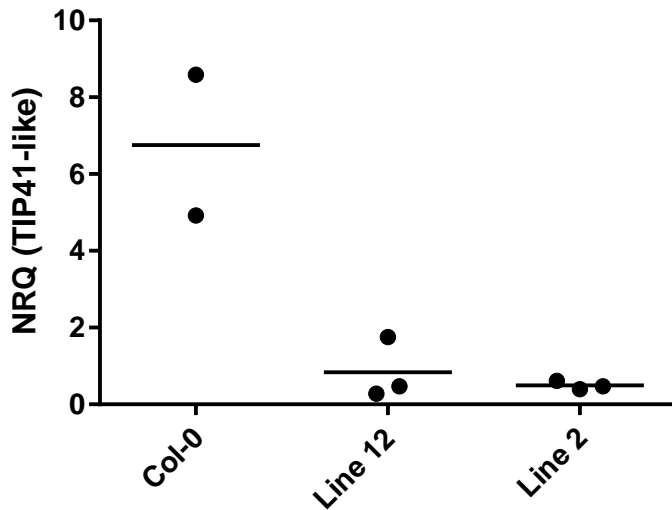

**Methods:**

Frozen developing seeds (9-11 DAF) were separated from silique tissue by silique popping method (Bates et al., 2013). ~50  $\mu$ L volume of frozen seeds per biological replicates were mechanically pulverized to a fine powder with steel beads (TissueLyser LT, QIAGEN), RNA was extracted and used for cDNA synthesis using SuperScript III First-Strand Synthesis System for RT-PCR (Life Technologies). RT-PCR utilized standard conditions as per Maxima SYBR Green/ROX qPCR Master Mix (Thermo) and BioRad CFX96™ Real-Time System and C1000™ Thermal Cycler with 45 cycles of amplification. The sequences for primers utilized are shown in supplemental table S1.

**Supplemental Figure S11.** Developing Seed Microsome GPAT Assays of Wild-Type and amiRNA Knockdown Lines.

GPAT assays with developing 9-11 DAF seed microsomes utilizing 3.55 nmol [<sup>14</sup>C]glycerol 3-phosphate and 25 nmol palmitoyl-CoA, for 15 min at 24°C.

(A) Phosphor image of TLC plate indicating that [<sup>14</sup>C]LPA was the major product of developing seed microsome activity with palmitoyl-CoA.

(B) Percent of wild-type (Col-0) GPAT activity in *GPAT9* amiRNA knockdown lines 2 and 12. Mean and S.D. of two replicate assays.

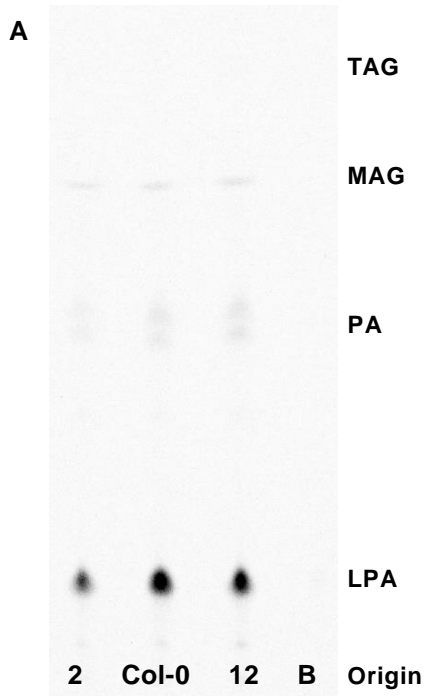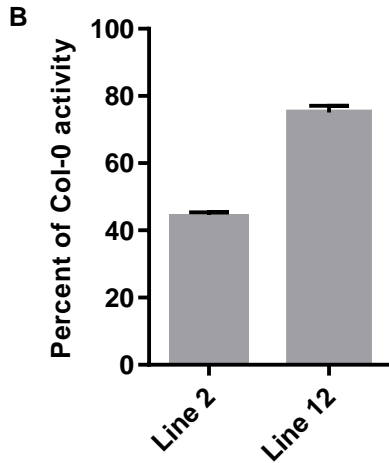

**Supplementary Figure S12.** Testing of Protein:Protein Interactions Between AtLPAAT2, AtDGAT1, and AtLPCAT2.

Cub-LexA bait fusions and Nub prey fusions were produced as described in Figure 8 and in the main text. (A-B) Prototrophic growth assay of yeast strains containing various combinations of Arabidopsis acyltransferase bait plasmids co-expressed with potential NubG-fusion acyltransferase prey plasmids. Serial dilutions of cells expressing different bait-prey combinations were plated on non-selective (A) or selective (B) media. (C) Quantitative measurement of  $\beta$ -galactosidase activity from cell lysates of the strains used in the serial dilution assays. Cultures used for serial dilutions shown in A. and B. contained bait and prey combinations as numbered in C.

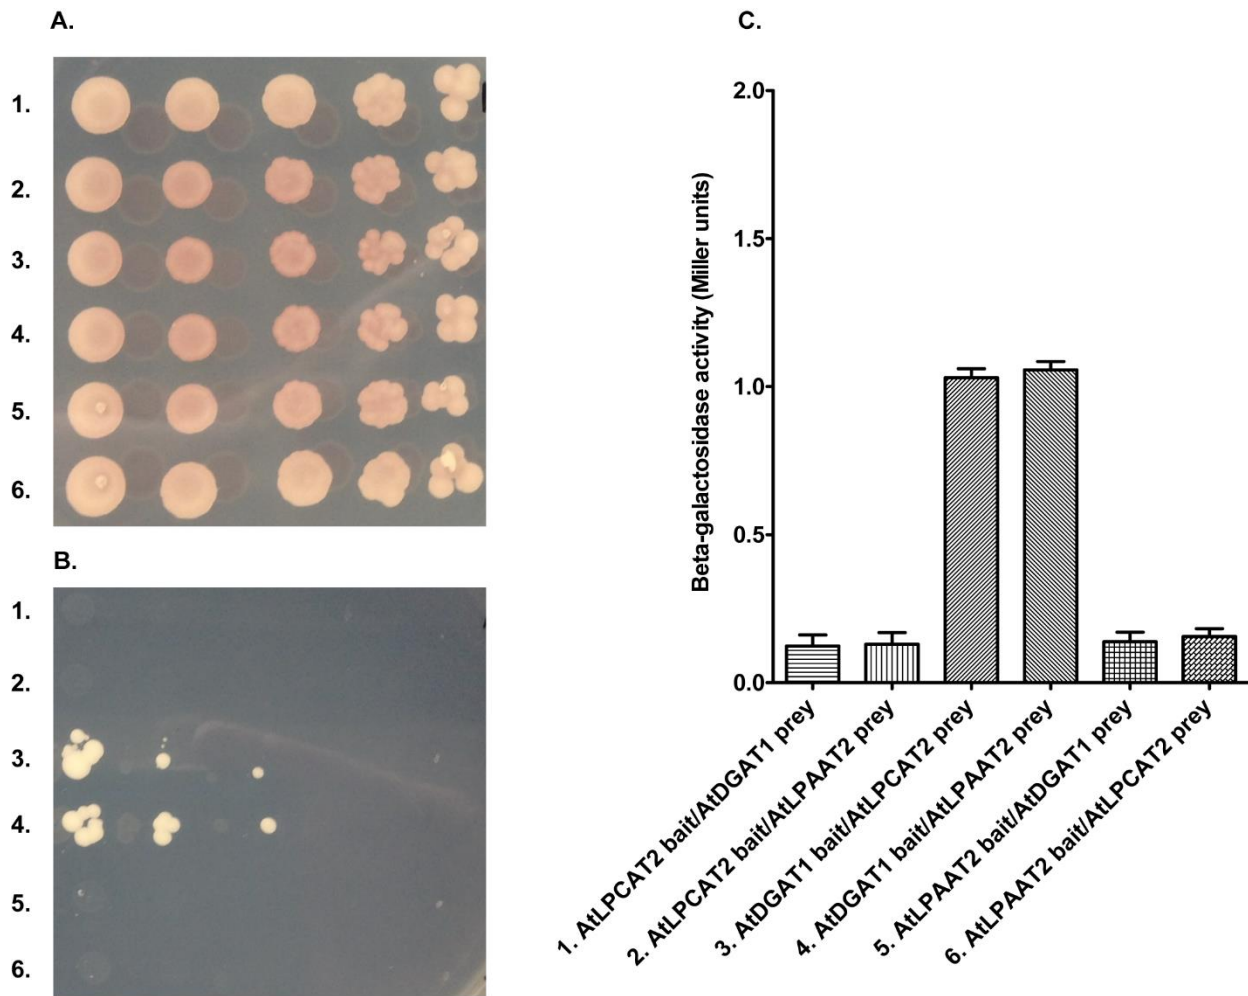

**Supplementary Figure S13.** Sequence Identity Comparisons Between AtGPAT1 and

AtGPAT9 to the Animalia Subset of the NCBI Protein Database.

The top hits to AtGPAT9 and AtGPAT1 are shown first, followed by the best hits from within the individual species that provided the top hits to the alternate AtGPAT sequence. See text for additional details.

>AtGPAT9

MSSTAGRLVTSKSELDDLHPNIEDYLPSSGSSINEPRGKLSLRDLLDISPTLTEAAGAIVDDSFTTRCFKSNPPEPWNW  
NIYLFPLYCFGVVRYCILFPLRCFTLAFGWIIIFLSLFIIPVNALLKGQDRLRKKIERVLVEMICSFFVASWTGVVKY  
HGPRPSIRPKQVYVANHTSMIDFIVLEQMTAFVIMQKHPGWVGLLQSTILESVGCIWFNRSEAKDREIVAKKLRDH  
VQGADSNPLLIIFPEGTCVNNNYTVMFKKGAFELDCTVCPIAIKYNKIFVDAFWNSRKQSFTMHLLQLMTSWAVVCEV  
WYLEPQTIRPGETGIEFAERVRDMISLRAGLKKVPWDGYLKYSRPSPKHSEKQQSFAESILARLEEK

vs Metazoa/Animalia:

PREDICTED: glycerol-3-phosphate acyltransferase 3 [Orcinus orca]

Sequence ID: [ref|XP\\_004282203.1|](#) Length: 438 Number of Matches: 1

[Gene](#)-associated gene details

[Map Viewer](#)-aligned genomic context

Range 1: 75 to 429 [GenPeptGraphics](#) Next Match Previous Match [First Match](#)

Alignment statistics for match #1

| Score     | Expect | Method                                                          | Identities    | Positives     | Gaps        | Frame |
|-----------|--------|-----------------------------------------------------------------|---------------|---------------|-------------|-------|
| 259       | 2e-    | Compositional                                                   |               |               |             |       |
| bits(661) | 82()   | matrix adjust.                                                  | 139/360 (39%) | 211/360 (58%) | 17/360 (4%) |       |
| Features: |        |                                                                 |               |               |             |       |
| Query     | 24     | DYLPSSGSSINEPRGK-LSLRDLLDISPTLTEAAGAIVDDSFTTRCFKSNPPEPWNW----   | N             |               |             | 78    |
|           |        | D P ++ RG+ L D+ S EA IV+D T+ F S WN N                           |               |               |             |       |
| Sbjct     | 75     | DESPMEKGLSGLRGRDFELSDVIFYFSKKGLEA---IVEDEVTVQRFSSSEELVSWNLLTRTN |               |               |             | 131   |
| Query     | 79     | I---YLFP----LYCFGVVRYCILFPLRCFTLAFGWIIIFLSLFIIPVNALLKGQDRLRKK   |               |               |             | 131   |
|           |        | + Y+ P ++ GV+VRYC+L PLR TLAF I FL + + L + LR +                  |               |               |             |       |
| Sbjct     | 132    | VNFQYISPKLTMVWVLGVIVRYCVLLPLRV-TLAFVVISFLVIGTTLVGLP-ESSLRNR     |               |               |             | 189   |
| Query     | 132    | IERVLVEMICSFFVASWTGVVKYHGPRPSIRPKQVYVANHTSMIDFIVLEQMTAFVIMQ     |               |               |             | 191   |
|           |        | + ++ C V ++G + YH + + + VANHTS ID ++L +A++ Q                    |               |               |             |       |
| Sbjct     | 190    | LSELVHLTCCRICVRALSGETIHYHNKQYRPQKGGICVANHTSPIDVLILTTDGCYAMVGQ   |               |               |             | 249   |
| Query     | 192    | KHPGWVGLLQSTILESVGCIWFNRSEAKDREIVAKKLRDHVQGADSNPLLIIFPEGTCVNN   |               |               |             | 251   |
|           |        | H G +G++Q +++S +WF RSE KDR +V K+LR+H+ P+LIFPEGTC+NN             |               |               |             |       |
| Sbjct     | 250    | VHGLMGIIQRAMVKSCPHVWFERSEMKDRHLVTKRLREHIADKKKLPILIFPEGTCINN     |               |               |             | 309   |
| Query     | 252    | NYTVMFKKGAFELDCTVCPIAIKYNKIFVDAFWNSRKQSFTMHLLQLMTSWAVVCEVWYL    |               |               |             | 311   |
|           |        | +MFKKG+FE+ T+ P+AIKYN F DAFWNS K + +LL++MTSWA+VC+VWY+           |               |               |             |       |
| Sbjct     | 310    | TSVMMFKKGSFEIGGTIYPVAIKYNPQFGDAFWNSSKYNMVSYLLRMMTSAIVCDVWYM     |               |               |             | 369   |
| Query     | 312    | EPQTIRPGETGIEFAERVRDMISLRAGLKKVPWDGYLKYSRPSPKHSEKQQSFAESILA     |               |               |             | 371   |
|           |        | P T GE ++FA RV+ I+++ GL ++PWDG LK ++ E +Q++++ I+                |               |               |             |       |
| Sbjct     | 370    | PPMTREEGEDAVQFANRVKSAIAIQGGLTELPWDGGLKRAKVKDTFKEEQQKNYSKMIVG    |               |               |             | 429   |

>AtGPAT1

MVLPELLVILAIEWLYRLLAKSCYRAARKLRGYGFQLKNLLSLSKTQSLHNNSQHHLHNHHQQNHPNQTLDQSLDPL  
FPSLTKYQELLLDKNRACSVSSDHYRDTFFCDIDGVLLRQHSSKHFHTFFPYFMLVAFEGGSIIRAILLLLSCSFLW  
TLQQETKLRVLSFITFSGLRVKMDNVSRSVLPKFFLENLNIQVYDIWARTEYSKVVFTSLPQVLVERFLREHLNAD  
DVIGTKLQEIKVMGRKFYTGGLASGSGFVLKHKSAEDYFFDSKKKPALGIGSSSPQDHIFISICKEAYFWNEEESMS  
KNNALPRERYPKPLIFHDGRLAFLPTPLATLAMFIWLPIGFLLAVFRISVGVFLPYHVANFLASMSGVRITFKTHNL  
NNGRPEKGNVGVLYVCNHRTLLDPVFLTTSLGKPLTAVTYSLSKFSEFIAPLKTVSLKRD RKDGEAMQRLLSKGDL  
VVCPEGTTCREPYLLRFSPLFAELTEDIVPVAVDARVSMFYGTASGLKCLDPIFFLMNPRPVYCLEILKKLPKEMT  
CAGGKSSFEVANFIQGELARVLGFECTNLTRRD KYLVLAGNEGIVR

vs Metazoa/Animalia:

PREDICTED: ancient ubiquitous protein 1-like isoform X1 [Xiphophorus maculatus]

Sequence ID: [ref|XP\\_005811174.1|](#) Length: 415 Number of Matches: 1

[Gene](#)-associated gene details

[Map Viewer](#)-aligned genomic context

Range 1: 20 to 262 [GenPeptGraphics](#) Next Match Previous Match [First Match](#)

Alignment statistics for match #1

| Score          | Expect  | Method                       | Identities   | Positives     | Gaps         | Frame |
|----------------|---------|------------------------------|--------------|---------------|--------------|-------|
| 59.3 bits(142) | 3e-10() | Compositional matrix adjust. | 69/256 (27%) | 109/256 (42%) | 31/256 (12%) |       |

Features:

|       |     |                                                                |     |
|-------|-----|----------------------------------------------------------------|-----|
| Query | 336 | LATLAMFIWLPIGFLLAVFRISVGV-----FLPYHVANFLASMSGVRITFKTH          | 383 |
|       |     | +A L + I+ P+G L + RI +GV F+ V ++S+ G+ + +                      |     |
| Sbjct | 20  | VALLLLLLIYSPVGVCLMLMRIFIGVHVFLVSCAIPDSFVRRFVVRVMSSVLGMHVRQR--  | 77  |
| Query | 384 | NLNNGRPEKGNVGVLYVCNHRTLLDP--VFLTTSLGKPLTAVTYSLSKFSEFIAPLKTVS   | 441 |
|       |     | N R N+ L VCNH T D + L T P + ++ + + S                           |     |
| Sbjct | 78  | ---NPRS RDKN TK-LCVCNHVTEFDHNIINLLTPFNTPQLEGSTGFMCWARGFMEIHSAS | 133 |
| Query | 442 | LKRDRKKDGEAMQRLLSKGDL----LVVCPEGTTCREPYLLRFSPLFAELTEDIVPVAVDA  | 497 |
|       |     | ++ GE++QR S LV E TT LL+FS LTE I PVA+                           |     |
| Sbjct | 134 | ---SQEAVGESLQRYCSADGAPLLVFPEEDTTNGRAGLLKFSSWPFTLTESI QPVALRV   | 190 |
| Query | 498 | RVSMFYGTASGLKCLDPIFFLMNPRPVYCLEILKKLPKEMTCAGGKSSFEVANFIQGEL    | 557 |
|       |     | + +T D ++ +P VY + L + ++ G+S+ E AN +Q L                        |     |
| Sbjct | 191 | SRPLLSLSTVSWLTDLLWTFSPCTVYHVS WLPPVSRQ----DGESTQEFANKVQELL     | 246 |
| Query | 558 | ARVLGFECTNLTRDK 573                                            |     |
|       |     | A LG T +T+ DK                                                  |     |
| Sbjct | 247 | AIELGLVSTKITKADK 262                                           |     |

>AtGPAT9

MSSTAGRLVTSKSELDDLHPNIEDYLPSPGSSINEPRGKLSLRDLLDISPTLTEAAGAIVDDSFTRCFKSNPPEPWNW  
NIYLFPLYCFGVVVRYCILFPLRCFTLAFGWIIIFLSLFI PVNALLKGQDRLRKKIERVLVEMICSFFVASWTGVVY  
HGPRPSIRPKQVYVANHTSMIDFIVLEQMTAFVIMQKHPGWVGLLQSTILESVCIFWNRSEAKDREIVAKKLRDH  
VQGADSNPLLIIFPEGTCVNNNYTVMFKKGAFELDCTVCPIAIKYNKIFVDAFWNSRKQSFTMHLLQLMTSWAVVCEV  
WYLEPQTIRPGETGIEFAERVRDMISLRAGLKKVPWDGYLKYSRSPKHSERKQQSFAESILARLEEK

PREDICTED: glycerol-3-phosphate acyltransferase 4-like [Xiphophorus maculatus]

Sequence ID: [ref|XP\\_005812873.1|](#) Length: 455 Number of Matches: 1

|       |     |                                                                                                                         |     |
|-------|-----|-------------------------------------------------------------------------------------------------------------------------|-----|
| Query | 22  | I E D Y L P S G S S I N E P R G K L S L R D L L D I S P T L T E A A G A I V D D S F T R C F K S N P P E P W N W - - - - | 77  |
|       |     | I+D S + EPR +L+ D+ +A I+DD T+ F + E WN                                                                                  |     |
| Sbjct | 93  | I Q D L R H S A G C L - E P R F E L A - - - - - D V F F F C R K A L E N I I D D D V T K R F S A Q K L E N W N L L T R S | 146 |
| Query | 78  | - - - - - N I Y L F P L Y C F G V V V R Y C I L F P L R C F T L A F G W I I F L S L F I P V N A L L K G Q D R L R K     | 130 |
|       |     | ++ + L+ GV++RY +L P R G +F+ L V L +LR                                                                                   |     |
| Sbjct | 147 | N H N F C Y I S L K V L A L W I L G V L I R Y G V L L P F R V T V A I T G I F L F I V L S T V V G - - L I P C T K L R T | 204 |
| Query | 131 | K I E R V L V E M I C S F F V A S W T G V V K Y H G P R P S I R P K Q V Y V A N H T S M I D F I V L E Q M T A F A V I M | 190 |
|       |     | + + M V S T G + + Y H + + + V A N H T + + D I + L + + + +                                                               |     |
| Sbjct | 205 | Y L S D K V H L M G Y R L C V R S L T G I I T Y H N R K N K P K N D G I C V A N H T T P V D G I I L A N D H C Y S L V G | 264 |
| Query | 191 | Q K H P G W V G L L Q S T I L E S V G C I W F N R S E A K D R E I V A K K L R D H V Q G A D S N P L L I F P E G T C V N | 250 |
|       |     | Q H G +G++Q + +S I W F R E K D R +VAK+L+DHV + +P+LIFPEG CVN                                                             |     |
| Sbjct | 265 | Q L H G G L L G M I Q R A M A K S S P H I W F E R D E V K D R R L V A K R L K D H V A D E N K H P V L I F P E G F C V N | 324 |
| Query | 251 | N N Y T V M F K K G A F E L D C T V C P I A I K Y N K I F V D A F W N S R K Q S F T M H L L Q L M T S W A V V C E V W Y | 310 |
|       |     | N +MF+KG+FE+ CT+ P AIKY+ F DAFWNS K +LL++M+SWA+VC VWY                                                                   |     |
| Sbjct | 325 | N T S V M M F R K G S F E I G C T I Y P A A I K Y D P R F G D A F W N S S K F G L V G Y L L R M M S S W A I V C S V W Y | 384 |
| Query | 311 | L E P Q T I R P G E T G I E F A E R V R D M I S L R A G L K K V P W D G Y L K Y S R P S P K H S E R K Q Q S F A E S I L | 370 |
|       |     | L P + G E ++FA RV+ I+ + G L + W D L K ++ E +QQ +++ +L                                                                   |     |
| Sbjct | 385 | L P P M N R K E G E D A M Q F A N R V K A A I A A Q G G L V D L I W D A G L K R T K V K D T F K E D Q Q Q L Y S K I L L | 444 |
| Query | 371 | ARLEE 375                                                                                                               |     |
|       |     | E                                                                                                                       |     |
| Sbjct | 445 | GDHEN 449                                                                                                               |     |

AtGPAT9 vs Xiphophorus maculatus (top AtGPAT1 hit):

PREDICTED: glycerol-3-phosphate acyltransferase 4-like [Xiphophorus maculatus]

Sequence ID: [ref|XP\\_005812873.1|](#) Length: 455 Number of Matches: 1

Related Information

[Gene](#)-associated gene details

[Map Viewer](#)-aligned genomic context

Range 1: 93 to 449 [GenPeptGraphics](#) Next Match Previous Match [First Match](#)

| Score            | Expect                                                                                                                  | Method                          | Identities    | Positives     | Gaps        | Frame |
|------------------|-------------------------------------------------------------------------------------------------------------------------|---------------------------------|---------------|---------------|-------------|-------|
| 235<br>bits(600) | 1e-<br>74()                                                                                                             | Compositional<br>matrix adjust. | 131/365 (36%) | 200/365 (54%) | 19/365 (5%) |       |
| Features:        |                                                                                                                         |                                 |               |               |             |       |
| Query 22         | I E D Y L P S G S S I N E P R G K L S L R D L L D I S P T L T E A A G A I V D D S F T R C F K S N P P E P W N W - - - - |                                 |               |               |             | 77    |
|                  | I + D S + E P R + L + D + + A I + D D T + F + E W N                                                                     |                                 |               |               |             |       |
| Sbjct 93         | I Q D L R H S A G C L - E P R F E L A - - - - - D V F F F C R K A L E N I I D D D V T K R F S A Q K L E N W N L L T R S |                                 |               |               |             | 146   |
| Query 78         | - - - - - N I Y L F P L Y C F G V V V R Y C I L F P L R C F T L A F G W I I F L S L F I P V N A L L K G Q D R L R K     |                                 |               |               |             | 130   |
|                  | + + + L + G V + + R Y + L P R G + F + L V L + L R                                                                       |                                 |               |               |             |       |
| Sbjct 147        | N H N F C Y I S L K V L A L W I L G V L I R Y G V L L P F R V T V A I T G I F L F I V L S T V V G - - L I P C T K L R T |                                 |               |               |             | 204   |
| Query 131        | K I E R V L V E M I C S F F V A S W T G V V K Y H G P R P S I R P K Q V Y V A N H T S M I D F I V L E Q M T A F A V I M |                                 |               |               |             | 190   |
|                  | + + M V S T G + + Y H + + + V A N H T + + D I + L + + + +                                                               |                                 |               |               |             |       |
| Sbjct 205        | Y L S D K V H L M G Y R L C V R S L T G I I T Y H N R K N K P K N D G I C V A N H T T P V D G I I L A N D H C Y S L V G |                                 |               |               |             | 264   |
| Query 191        | Q K H P G W V G L L Q S T I L E S V G C I W F N R S E A K D R E I V A K K L R D H V Q G A D S N P L L I F P E G T C V N |                                 |               |               |             | 250   |
|                  | Q H G + G + + Q + + S I W F R E K D R + V A K + L + D H V + + P + L I F P E G C V N                                     |                                 |               |               |             |       |
| Sbjct 265        | Q L H G G L L G M I Q R A M A K S S P H I W F E R D E V K D R R L V A K R L K D H V A D E N K H P V L I F P E G F C V N |                                 |               |               |             | 324   |
| Query 251        | N N Y T V M F K K G A F E L D C T V C P I A I K Y N K I F V D A F W N S R K Q S F T M H L L Q L M T S W A V V C E V W Y |                                 |               |               |             | 310   |
|                  | N + M F + K G + F E + C T + P A I K Y + F D A F W N S K + L L + + M + S W A + V C V W Y                                 |                                 |               |               |             |       |
| Sbjct 325        | N T S V M M F R K G S F E I G C T I Y P A A I K Y D P R F G D A F W N S S K F G L V G Y L L R M M S S W A I V C S V W Y |                                 |               |               |             | 384   |
| Query 311        | L E P Q T I R P G E T G I E F A E R V R D M I S L R A G L K K V P W D G Y L K Y S R P S P K H S E R K Q Q S F A E S I L |                                 |               |               |             | 370   |
|                  | L P + G E + + F A R V + I + + G L + W D L K + + E + Q Q + + + + L                                                       |                                 |               |               |             |       |
| Sbjct 385        | L P P M N R K E G E D A M Q F A N R V K A A I A A Q G G L V D L I W D A G L K R T K V K D T F K E D Q Q Q L Y S K I L L |                                 |               |               |             | 444   |
| Query 371        | A R L E E 375                                                                                                           |                                 |               |               |             |       |
|                  | E                                                                                                                       |                                 |               |               |             |       |
| Sbjct 445        | G D H E N 449                                                                                                           |                                 |               |               |             |       |

AtGPAT1 vs Orcinus orca (top AtGPAT9 species hit):

PREDICTED: neuropilin-2 isoform X6 [Orcinus orca]

Sequence ID: [ref|XP\\_004262866.1|](#) Length: 901 Number of Matches: 1

Related Information

[Gene](#)-associated gene details

[Map Viewer](#)-aligned genomic context

Range 1: 827 to 882 [GenPeptGraphics](#) Next Match Previous Match [First Match](#)

Alignment statistics for match #1

| Score            | Expect  | Method                          | Identities | Positives  | Gaps     | Frame |
|------------------|---------|---------------------------------|------------|------------|----------|-------|
| 30.4<br>bits(67) | 0.041() | Compositional matrix<br>adjust. | 14/56(25%) | 27/56(48%) | 0/56(0%) |       |

Features:

|       |     |                        |                                               |                      |
|-------|-----|------------------------|-----------------------------------------------|----------------------|
| Query | 335 | PLATLAMFIWLP           | PIGFLLAVFRISVGVFLPYHVANFLASMSGVRITFKTHNLNNGRP | 390                  |
|       |     | P+                     | ++ G +L + +++ + L YH + A + IT+KT + NG P       |                      |
| Sbjct | 827 | PIPAYWYYVMAAGGAVLVLVSV | LALVLHYHRFRYAAKKT                             | DHSITYKTSHYTNGAP 882 |



**Supplemental Table S1.** Primers utilized for PCR, RT-PCR, & qPCR.

| <b>Purpose</b>                           | <b>Primer Name</b> | <b>Sequence (5' to 3')</b>  |
|------------------------------------------|--------------------|-----------------------------|
| <b>Genotyping gpat9-1 (Salk_052947C)</b> |                    |                             |
| Gene specific                            | GPAT9 salk F1      | ACTTTCTTTGGAGAGTCGCTGT      |
| Gene specific                            | GPAT9 salk R1      | CATCAACAATGGCACCAGCA        |
| T-DNA left border                        | LBb1.3             | ATTTTGCCGATTTTCGGAAC        |
| <b>Genotyping gpat9-2 (GABI_867A06)</b>  |                    |                             |
| Gene specific                            | GPAT9 GK F1        | GCAGGCGTGATTTGCTAGAC        |
| Gene specific                            | GPAT9 GK R1        | AATGCGGTCATCTGCTCCAA        |
| T-DNA left border                        | o8409              | ATATTGACCATCATACTCATTGC     |
| <b>Genotyping qrt1-4 (CS25041)</b>       |                    |                             |
| Gene specific                            | Qrt F2             | TTTGCCTCTCAGGGTGTTC         |
| Gene specific                            | Qrt R1             | AATGAGAGCTATGCGGGAGA        |
| T-DNA left border                        | LBb1.3             | ATTTTGCCGATTTTCGGAAC        |
| <b>GPAT9 RT-PCR (Fig. S1)</b>            |                    |                             |
|                                          | GPAT9 ORF start    | ATGAGCAGTACGGCAGGGAGGC      |
|                                          | GPAT9 ORF end      | TGCAAAAGTGAGTTATGTTTATTGAGA |
| <b>qPCR of GPAT9 (Fig. S1)</b>           |                    |                             |
|                                          | GPAT9LP1046        | AGAGAGGGTCAGAGACATGA        |
|                                          | G9 qPCR R 1172     | CGACTCTGCGAAACTCTGTTG       |
|                                          | qTIP41-like829F    | ACATTTTCAGTCTCTATCTGCGAAAGG |
|                                          | qTIP41-like946R    | GGATCTTCAGTTTCTGTGTCGTATGC  |

**Supplemental Table S2.** Gene identifiers for GPAT9, LPEAT1, and LPEAT2 sequences used in Figures 1 and S1 in the main text. AGI locus identifiers for the three Arabidopsis genes are described at The Arabidopsis Information Resource (TAIR) homepage (<https://www.arabidopsis.org/>). The Genbank accession numbers are shown for tung tree GPAT9 (*Vernicia fordii*, Gidda et al., 2009) and *Ricinus communis* GPAT9 [originally annotated as a putative LPAAT, Burgal et al., (2008)]. All other identifiers are as listed for each species in the Phytozome 10.3 database (<http://phytozome.jgi.doe.gov/pz/portal.html#>).

\*: not analyzed in this study.

| Species                           | GPAT9                                    | LPEAT1            | LPEAT2            |
|-----------------------------------|------------------------------------------|-------------------|-------------------|
| <i>Arabidopsis thaliana</i>       | At5g60620                                | At1g80950         | At2g45670         |
| <i>Vernicia fordii</i>            | FJ479751                                 | *                 | *                 |
| <i>Physcomitrella patens</i>      | Phpat.011G104300                         | *                 | *                 |
| <i>Selaginella moellendorffii</i> | 152980                                   | *                 | *                 |
| <i>Aquilegia coerulea</i>         | Aquca_047_00038.1                        | *                 | *                 |
| <i>Brachypodium distachyon</i>    | Bradi1g25790                             | *                 | *                 |
| <i>Solanum tuberosum</i>          | PGSC0003DMT400032021                     | *                 | *                 |
| <i>Salix purpurea</i>             | SapurV1A.0039s0700                       | *                 | *                 |
| <i>Gossypium raimondii</i>        | Gorai.012G158300 and<br>Gorai.005G258500 | *                 | *                 |
| <i>Cucumis sativus</i>            | Cucsa.099550                             | *                 | *                 |
| <i>Zea mays</i>                   | GRMZM2G165681                            | GRMZM2G096010     | GRMZM2G116243     |
| <i>Setaria italica</i>            | Si030220m                                | Si022261m         | Si006175m         |
| <i>Oryza sativa</i>               | LOC_Os07g34730                           | LOC_Os05g28960    | LOC_Os06g49790    |
| <i>Citrus clementina</i>          | Ciclev10028668m                          | Ciclev10001396m   | Ciclev10019536m   |
| <i>Glycine max</i>                | Glyma.09G119200                          | Glyma.04G033600   | Glyma.03G019200   |
| <i>Prunus persica</i>             | ppa007262m                               | ppa006689m        | ppa003784m        |
| <i>Populus trichocarpa</i>        | Potri.004G183300                         | Potri.014G042200  | Potri.014G074300  |
| <i>Ricinus communis</i>           | ACB30546                                 | 30174.m008937     | 30170.m014002     |
| <i>Theobroma cacao</i>            | Thecc1EG006479t1                         | Thecc1EG033997t1  | Thecc1EG005455t1  |
| <i>Vitis vinifera</i>             | GSVIVT01023935001                        | GSVIVT01009661001 | GSVIVT01027580001 |

## **SUPPLEMENTAL REFERENCES**

- Bates, P., Jewell, J., and Browse, J.** (2013). Rapid separation of developing Arabidopsis seeds from siliques for RNA or metabolite analysis. *Plant Methods* **9**, 9.
- Czechowski, T., Stitt, M., Altmann, T., Udvardi, M.K., and Scheible, W.-R.** (2005). Genome-wide identification and testing of superior reference genes for transcript normalization in Arabidopsis. *Plant Physiol.* **139**, 5-17.
- Peterson, R., Slovin, J.P., and Chen, C.** (2010). A simplified method for differential staining of aborted and non-aborted pollen grains.
- Regan, S.M., and Moffatt, B.A.** (1990). Cytochemical Analysis of Pollen Development in Wild-Type Arabidopsis and a Male-Sterile Mutant. *The Plant Cell Online* **2**, 877-889.
